1 **Deciphering the transcriptomic insight during organogenesis in castor (*Ricinus communis* L.), jatropha**  
2 **(*Jatropha curcas* L.) and sunflower (*Helianthus annuus* L.)**

3

4 **Sai Sudha Puvvala<sup>1, 2#</sup>, Tarakeswari Muddanuru<sup>2#</sup>, Padmavathi AV Thangella<sup>3</sup>, Aniel Kumar O<sup>1</sup>, Navajeet**  
5 **Chakravartty<sup>4</sup>, Saurabh Gupta<sup>4</sup>, Vineeth Kodengil Vettath<sup>5</sup>, Krishna Mohan Ananta Venkata Sri Katta<sup>4</sup>,**  
6 **Sivarama Prasad Lekkala<sup>4</sup>, Boney Kuriakose<sup>5</sup>, Mulpuri Sujatha<sup>2\*</sup> and Vijay Bhasker Reddy Lachagari<sup>4</sup>**

7

8 <sup>1</sup>Andhra University, Visakhapatnam 530 003, India

9 <sup>2</sup>ICAR-Indian Institute of Oilseeds Research, Rajendranagar, Hyderabad 500 007, India

10 <sup>3</sup>Osmania University, Tarnaka, Hyderabad 500 007, India

11 <sup>4</sup>AgriGenome Labs Pvt Ltd, Genome Valley , Hyderabad 500 078, India

12 <sup>5</sup>AgriGenome Labs Pvt Ltd, Kochi 682 037, India

13

14 # Both contributed equally

15

16 \*Corresponding author

17 Phone: 0091-40-24598110

18 Fax: 0091-40-24017969

19 e-mail: [mulpurisujata@yahoo.com](mailto:mulpurisujata@yahoo.com)

20

21 **Abstract**

22 **Background:** Castor is a non-edible oilseed crop with a multitude of pharmaceutical and industrial uses.  
23 Profitable cultivation of the crop is hindered by various factors and one of the approaches for genetic  
24 improvement of the crop belonging to a monotypic genus is to exploit biotechnological tools. The major  
25 limitation for successful exploitation of biotechnological tools is the *in vitro* recalcitrance of castor tissues.  
26 Response of castor tissues to *in vitro* culture is poor which necessitated study on understanding the molecular  
27 basis of organogenesis in cultured tissues of castor, through *de novo* transcriptome analysis, by comparing with  
28 two other crops (jatropha and sunflower) with good regeneration ability.

29  
30 **Results:** RNA-seq analysis was carried out with hypocotyl explants from castor, jatropha and cotyledons from  
31 sunflower cultured on MS media supplemented with different concentrations of hormones. Genes that showed  
32 strong differential expression analysis during dedifferentiation and organogenic differentiation stages of callus  
33 included components of auxin and cytokinin signaling, secondary metabolite synthesis, genes encoding  
34 transcription factors, receptor kinases and protein kinases. In castor, many genes involved in auxin biosynthesis  
35 and homeostasis like WAT1 (Wall associated thinness), vacuolar transporter genes, transcription factors like  
36 short root like protein were down-regulated while genes like DELLA were upregulated accounting for  
37 regeneration recalcitrance. Validation of 62 differentially expressed genes through qRT-PCR showed a consensus  
38 of 77.4% with the RNA-Seq analysis.

39  
40 **Conclusion:** This study provides information on the set of genes involved in the process of organogenesis in  
41 three oilseed crops which forms a basis for understanding and improving the efficiency of plant regeneration and  
42 genetic transformation in castor.

43  
44  
45 **Keywords** Auxins, Castor, Callus, DEGs, RNA-seq, Transcriptomics

46

## 47 **Background**

48 Castor (*Ricinus communis* L.) is a tropical plant that belongs to Euphorbiaceae family and grown mainly for its non-  
49 edible oil. Despite the premier position India holds with 85% of world's total castor production dominating  
50 international castor oil trade, profitable cultivation of this crop is hampered by the vulnerability of the released  
51 cultivars to several biotic threats at various stages of crop growth and the presence of the toxic protein, ricin in the  
52 seeds limiting the use of seed cake as cattle feed. The genetic variability to biotic stresses and seed quality traits is  
53 limited in the cultivar germplasm [1, 2]. Conventional breeding techniques have limited scope in improvement of  
54 resistance to biotic stresses and oil quality necessitating the exploitation of biotechnological and genetic engineering  
55 tools [3, 4, 5]. The main prerequisites for genetic improvement are reliable and reproducible protocols of plant  
56 regeneration from cultured tissues and a highly efficient transformation system [4, 6].

57 The morphological, physiological and molecular aspects of *in vitro* shoot organogenesis were studied extensively in  
58 various crops. *In vitro* shoot organogenesis is a complex and well-coordinated developmental process which  
59 involves several key genes, molecular markers and pathways [7]. In castor, several difficulties were highlighted  
60 regarding very slow response for shoot proliferation from the selected organogenic callus cultures [8]. There are  
61 only a few reports of plantlet differentiation in castor and in most of the cases, regenerated plantlets were obtained  
62 from apical meristems and shoot tip callus [4, 6, 8, 9, 10, 11, 12, 13, 14] and a single report on somatic  
63 organogenesis through callus-mediated shoot regeneration [15].

64 Most of the molecular studies concerned to *in vitro* organogenesis were confined to model plants like Arabidopsis.  
65 Che et al. [16] reported hundreds of up and down-regulated genes during *in vitro* callus, shoot and root development  
66 in Arabidopsis tissue culture. It is generally thought that pre-incubation on callus induction media is required to  
67 permit the dedifferentiation of tissues that will ultimately re-differentiate into organs [17, 18]. Christianson [19]  
68 classified the phenomenon of shoot organogenesis into three phases: acquisition of competency, identity  
69 specification and differentiation. Valvekens et al. [20] studied indirect organogenesis procedure in Arabidopsis in  
70 which root explants were induced to form callus on a callus induction medium and then transferred to shoot  
71 induction medium to induce shoots wherein cells become competent to shoot induction signals on callus induction  
72 medium itself [21, 22]. There is no single report for gene expression analysis (or) proteomic analysis identifying  
73 genes responsible for regeneration recalcitrance in castor. However, tissue-specific whole transcriptome sequencing  
74 in castor to understand triacylglycerol lipid biosynthetic pathway to increase ricinoleic acid was reported by Brown  
75 et al. [23]. Similarly, not much reports digged into the *in vitro* organogenesis gene pathways in jatropha and  
76 sunflower. Studies pertinent to jatropha include transcriptome analysis of flower sex differentiation, reported by Xu  
77 et al. [24] wherein the auxin signaling pathway that includes some of the genes like auxin responsive factors,  
78 gibberellin-regulated protein, AMP-activated protein kinase to play a major role in stamen development and embryo  
79 sac development were identified. Global expression patterns of transcripts regulated by cytokinins in the  
80 inflorescence meristems were reported in jatropha [25] and castor [26].

81 Despite the research efforts that expanded over the past three and half decades in castor tissue culture, no facile  
82 protocol of regeneration has been developed so far. Hence, there is an immediate need to understand the molecular  
83 basis of *in vitro* recalcitrance in castor. For this, RNA-seq analysis was undertaken as a platform to understand gene

84 expression profiles by comparing the transcript profiles of cultured castor tissues with jatropha (*Jatropha curcas* L.)  
85 which is also a member of Euphorbiaceae that shows good regeneration ability [27] and sunflower (*Helianthus*  
86 *annuus* L.), yet another oilseed crop possessing high adventitious shoot regeneration potential [28]. Transcriptome  
87 analysis can be a reliable and effective method, which can be used to know the complete set of transcripts in a cell  
88 and their quantity, for a specific developmental stage or physiological condition. RNA-seq provides a far more  
89 precise measurement of the levels of transcripts and their isoforms than other methods [29]. Furthermore, unraveling  
90 these regulatory cascades in castor from the stage of callus induction to shoot regeneration in the plant hormone  
91 media would be a major achievement to improve regeneration protocols in castor. Hence, the present study has been  
92 undertaken to identify the key genes controlling callus differentiation in castor, understand the molecular mechanism  
93 of regeneration in castor by comparing the transcript profiles with other oilseed crops (sunflower, jatropha) proven  
94 to have good regenerability *in vitro* as a prelude to overcome the problem of *in vitro* recalcitrance that limits the  
95 exploitation of castor through *in vitro* genetic transformation systems.

96

## 97 **Results**

### 98 **Plant callus generation and sample preparation**

99 In castor, callus-based regeneration was assessed on different combinations and concentrations of growth regulators  
100 incorporated in MS media and from explants like roots, cotyledons, hypocotyls, cotyledonary leaves and primary  
101 leaves. Of all the media tried, shoot-like structures were observed when cotyledonary leaves from seedlings were  
102 inoculated on MS media supplemented with 0.5 mg/l BA+1.0 mg/l NAA. In medium supplemented with 0.5 mg/l  
103 TDZ+1.0 mg/l 2-iP+1.0 mg/l NAA, green nodular callus was observed from cotyledon explants. Organogenic callus  
104 was observed from hypocotyls on medium supplemented with 0.2 mg/l 2,4-D+2.0 mg/l KN. Brownish green callus  
105 was observed from roots on medium supplemented with 0.2 mg/l BA+0.2 mg/l 2,4-D. Green soft callus was  
106 observed from the leaf explants when inoculated on media supplemented with 1.0 mg/l TDZ+0.5 mg/l NAA. Brown  
107 nodular callus was observed when cotyledons were inoculated on medium with 5.0 mg/l TDZ+2.0 mg/l 2-iP+1.0  
108 mg/l IBA. Green nodular callus was observed from cotyledons inoculated on medium with 2.0 mg/l TDZ+0.1 mg/l  
109 IBA. However, good response in terms of green nodular and organogenic callus was observed on medium  
110 supplemented with 2.0 mg/l 2-iP+0.1 mg/l TDZ+0.5 mg/l IAA from the hypocotyl explants in castor and jatropha  
111 and from the cotyledon explants in sunflower. The response of castor explants on different combinations of growth  
112 hormones is illustrated in Figure 1.

113 For RNA-seq analysis, hypocotyl explants from castor and jatropha and cotyledons from sunflower were cultured on  
114 MS media supplemented with 2.0 mg/l 2-iP+0.1 mg/l TDZ+0.5 mg/l IAA as this hormonal combination favoured  
115 adventitious shoot regeneration in jatropha and sunflower and organogenic callus in castor. In castor, 7 days after  
116 culture, explants showed enlargement, however green nodular callus was observed only after 14 days of culture.  
117 Retaining the callus on the media resulted only in callus growth but without regeneration. In jatropha, callus  
118 formation was observed from the cut ends 7 days after inoculation, the size of the callus was further increased 14  
119 days after culture and after 21 days, shoot like structures were observed from enlarged callus in the explants. In  
120 sunflower, the explants showed significant enlargement after 7 days of inoculation, base callus formation with small

121 shoots was observed 14 days after culture and after 21 days, the size of the callus was increased with formation of  
122 shoots and their differentiation (Figure 2). Therefore, the samples were collected at time intervals of 0, 7, 14 and 21  
123 days after culture (DAC) for RNA-seq analysis.

124

### 125 **Reads filtering and *de novo* assembly**

126 The quality and quantity of RNA extracted from the control and cultured samples of the three crops were good and  
127 cDNA libraries were prepared. A total of 58,304,422 and 44,045,004 raw reads were generated for castor cultured  
128 tissues (C-SD) and control castor (CC) samples. The number of raw reads was 5,201,052 and 43,614,842 for  
129 jatropha cultured tissues (J-SD) and jatropha control (JC), respectively while 46,548,738 and 38,366,150 raw reads  
130 were found in sunflower cultured tissues (S-SD) and sunflower control (SC), respectively (Table 1). The quality of  
131 the sequences obtained from the sequencer depends on the base quality score distribution, average base content per  
132 read and GC distribution in the reads. The average base quality was above Q30 (error-probability  $\geq 0.001$ ) for  
133 92.5% of the bases and GC (%) ranged from 42 to 52 with the highest recorded in the sunflower cultured tissue  
134 (Table 1). Along with organellar reads and rRNA, tRNA, snRNA and other RNA reads from the data was also  
135 removed from all samples. 32,379,620, 26,099,152, 23,355,268, 30,395,124 and 34,094,516, 35,661,324 filtered  
136 reads were obtained in C-SD, CC, J-SD, JC and S-SD, SC, respectively and having GC (%) ranging 44.3 to 52.0,  
137 with Q30 range of 95.26 to 96.47 of all filtered samples. High-quality reads were assembled and total of 109,343,  
138 94,073 and 1,30,548 transcripts were annotated in castor, jatropha and sunflower, respectively. Length of longest  
139 and mean GC (%) of transcripts ( $\geq 200$  bp length) of each cultivar (Table 1). Subsequently, 80,092, 62,719, 85,267  
140 unigenes between the control and cultured samples of castor, sunflower and jatropha, respectively were pooled out  
141 and further used as transcriptome.

142

### 143 **Estimation of differentially expressed genes**

144 To obtain differentially expressed genes/transcripts (DEGs), trimmed reads of C-SD, CC, J-SD, JC, and S-SD, SC  
145 were aligned with assembled transcriptomes of castor, jatropha and sunflower, respectively. Alignment percentages  
146 of the reads ranged from 73.6% to 94.2% with the highest alignment percentage observed in castor control tissue  
147 (94.2%). A total of 15,194,137 reads were aligned from 161,898,810 filtered paired-end reads in cultured castor  
148 samples while 12,297,920 reads were aligned from 13,049,576 filtered paired end reads in the controls (Table 2).  
149 Alignment results indicated 98,414, 84,375 and 120,779 unique transcripts (after removal of redundant transcripts)  
150 in castor (Additional file 1: Table S1), jatropha (Additional file 2: Table S2) and sunflower, (Additional file 3:  
151 Table S3) respectively along with their basic, structural, functional information that has been predicted using  
152 BLASTX. It has been identified that 55,576 (69.39%), 40,402 (64.41%) and 52,638 (61.73%) transcripts of castor,  
153 jatropha and sunflower have at least one significant hit in NCBI database with identity of 40% at protein level and  
154 E-value of  $\geq 1e-5$  (Table 2). The expression levels were calculated using a normalizing statistic called fragments  
155 mapped per kilobase of exon per million reads mapped (FPKM) which provides a measure of expression level that  
156 accounts for variation in gene length. A total of 72,416, 57,742, 50,582, 53,627, and 27,416, 75,509 transcripts of C-  
157 SD, CC, J-SD, JC, and S-SD, SC, respectively qualified the FPKM  $\geq 1.0$  criteria. All unique transcripts were used in

158 EdgeR for DEGs analysis. The bar chart represents the log2fold change (FC) values for all genes, and the cultured  
159 samples were compared with control samples (Figure 3). Differential expression analysis of these transcripts based  
160 on P values  $\leq 0.05$  showed 4757, 2325, 738 upregulated and 2630, 1228, 841 downregulated genes in castor  
161 (Additional file 4: Tables S4 and S5), sunflower (Additional file 4: Tables S6 and S7) and jatropha (Additional file  
162 4: Tables S8 and S9), respectively. In addition, count per million (CPM) based distribution of DEGs are presented  
163 through a volcano plot (Figure 4). DEGs analysis infers that in castor, maximum number of genes is expressed  
164 corroborating with our main objective of the study.

165

### 166 **Gene ontology and functional annotations of DEGs**

167 The gene ontology (GO) terms for DEGs provides the information about biological processes (BP), molecular  
168 function (MF), and cellular components (CC). GO terms for DEGs of castor, jatropha and sunflower with their  
169 related information are presented in additional file 4: Tables S4-S9. Moreover, the significant GO terms related to  
170 BP, MF and CC in each cultivar are represented in Figure 5. Transcription and regulation of DNA-templated  
171 [GO:0006351, GO:0006355], translation [GO:0006412], nucleic acid binding [GO:0003676], carbohydrate  
172 metabolic process [GO:0005975], transmembrane transport [GO:0055085], signal transduction [GO:0007165] and  
173 protein folding [GO:0006457] terms of BP were prominent in the three crops (Figure 6a) indicating their primary  
174 role in regulation of various genes. However, terms carbohydrate metabolic process [GO:0005975], signal  
175 transduction [GO:0007165], microtubule-based movement [GO:0007018] and ubiquitin-dependent protein catabolic  
176 process [GO:0006511] associated genes are highly expressed in castor in comparison to jatropha and sunflower.  
177 MFs such as ATP binding [GO:0005524], zinc ion binding [GO:0008270], integral component of membrane  
178 [GO:0016021], nucleic acid binding [GO:0003676], metal ion binding [GO:0046872], protein serine/threonine  
179 kinase activity [GO:0004674] terms are the majorly participating in all three crops (Figure 6b). In castor, higher  
180 number of genes in DNA binding [GO:0003677], hydrolase activity [GO:0016787], protein kinase activity  
181 [GO:0004672], nucleotide binding [GO:0000166], transcription factor activity, sequence-specific DNA binding  
182 [GO:0003700], structural constituent of ribosome [GO:0003735], non-membrane spanning protein tyrosine kinase  
183 activity [GO:0004715], kinase activity [GO:0016301], iron ion binding [GO:0005506], sequence-specific DNA  
184 binding [GO:0043565], ligase activity [GO:0016874] and calcium ion binding [GO:0005509] terms are associated  
185 in comparison to jatropha and sunflower. Similarly, the CCs terms such as integral component of membrane  
186 [GO:0016021], ATP binding [GO:0005524], DNA binding [GO:0003677], intracellular [GO:0005622], nucleus  
187 [GO:0005634], ribosome [GO:0005840], cytoplasm [GO:0005737] terms associated genes are highly expressed in  
188 the three crops (Figure 6c). Overall this analysis provides a basic idea of gene function and further, in-depth analysis  
189 of gene function was carried out for DEGs and top hits were considered to extract organism name as well as their  
190 functions. In castor, *Ricinus communis* L. occupied the first place with highest number of transcripts followed by  
191 *Jatropha curcas*, *Vitis vinifera*, *Populus trichocarpa*, and *Populus euphratica*. In case of Jatropha, the number of  
192 transcripts were highest in *Jatropha curcas*, followed by *Ricinus communis* and *Vitis vinifera*. *Cynara cardunculus*  
193 var. *scolymus* had the maximum hits followed by *Vitis vinifera*, *Sesamum indicum*, and *Helianthus annuus* in case of

194 sunflower. Functions of DEGs were annotated using UniProt database and listed in Additional file 4: Tables S4-S9  
195 with their functional and structural descriptions.

196

### 197 **DEGs involved in callus formation, plant growth and hormone metabolism**

198 Genes that play an important role in auxin biosynthesis were observed in the three crops. Particularly, in castor,  
199 higher number of genes that play critical role in maintaining auxin levels were found to be downregulated while  
200 comparing with jatropha and sunflower. Auxin-induced protein 15A, indole-3-acetic acid-induced protein, IAA-  
201 amino acid hydrolase ILR1-like 3, auxin-induced protein, putative required for IAA biosynthesis, wall associated  
202 thinness (WAT1), vacuolar transporter genes, hypothetical proteins were significantly down-regulated. Noticeably,  
203 not many cytokinin pathway related genes were expressed in castor except, cytokinin riboside 5'-monophosphate  
204 phosphoribohydrolase, histidine-containing phosphotransfer protein which showed down-regulation (Additional file  
205 4: Tables S4 and S5). In jatropha, axial regulator (YABBY 1) gene that regulates the initiation of the embryonic  
206 shoot apical meristem (SAM) development, auxin transporter-like protein 3, a carrier protein which is involved in  
207 proton-driven auxin influx and mediates the formation of auxin gradient from developing leaves (site of auxin  
208 biosynthesis) to tips were up-regulated. Besides, cytokinin riboside 5'-monophosphate phosphoribohydrolase LOG5-  
209 like which is very important for shoot regeneration is up-regulated. The gene abscisic acid 8'-hydroxylase1 is found  
210 to be upregulated in castor and jatropha and catalyzes the committed step in the major ABA catabolic pathway  
211 (Additional file 4: Tables S6 and S7). However, in sunflower, significant plant hormone biosynthesis genes were  
212 not identified (Additional file 4: Tables S8 and S9).

213

### 214 **DEGs involved in different binding and cellular transportation activities**

215 In plants, various metals and biomolecules binding activity is generally supported by cellular transportation to  
216 maintain the cellular internal and external integrity. In castor, amino acid binding proteins, ATP binding proteins,  
217 metal ion binding proteins, calmodulin binding proteins, chlorophyll A/B binding proteins, DNA binding proteins,  
218 dehydration-responsive element-binding proteins, GTP binding proteins, lipid binding proteins and nucleic acid  
219 binding proteins were upregulated, while boron transporters, ATP-binding cassette transporters, calcium-  
220 transporting ATPases, copper transporters, sugar transporters, protein binding proteins and oligopeptide transporters  
221 also showed upregulations. Besides, downregulated binding and transporter proteins in castor include calcium ion  
222 binding protein, calmodulin binding protein, metal ion binding protein and ABC transporter family proteins,  
223 aquaporin transporters, ATP-binding cassette transporters, transporter proteins, Alanine-glyoxylate aminotransferase  
224 proteins, benzoate carboxyl methyltransferase, cationic amino acid transporter, copper-transporting ATPase,  
225 bidirectional sugar transporter, oligopeptide transporter, glycosyltransferase. The higher expression of ABC  
226 transporter family proteins binding and transporter, ATP-binding cassette transporters copper and sugar transporters  
227 indicates their role in growth regulator transportation (Additional file 4: Tables S4 and S5) [30, 31]. Similarly,  
228 various binding and transportation activities also observed in jatropha and sunflower and related protein expression  
229 can be seen in additional file 4: Tables S6, S7 and Tables S8 and S9, respectively.

230

### 231 **Identification of DEGs that work as transcription factors and other important proteins**

232 Transcription factors are the regulatory proteins which upon binding to specific DNA sequences regulate target gene  
233 expression. In castor, some of the transcription factors up-regulated belong to WRKY TF while GATA TF, NAC  
234 domain containing protein 62, zinc finger proteins, r2-r3 myb TFs, protein short root like were down-regulated. In  
235 *jatropha*, up-regulated TFs include MYB family (MYB 108, MYB 308), homeobox-leucine zipper protein  
236 MERISTEM L1 involved in the cell specification and pattern formation during embryogenesis, WRKY family  
237 (WRKY transcription factor 75 isoform X1). However, wound-induced protein, WIN1 precursor that favors callus  
238 formation from wound tissue was down-regulated. Further, some important proteins participating in general plant  
239 stress defense mechanism such as, Heat shock proteins family, Flavonol synthase/flavanone 3-hydroxylase, fructose-  
240 bisphosphate aldolase, disease resistance response proteins, etc. were also upregulated in castor [32, 33] while serine  
241 proteinase family proteins are found downregulated in castor [34]. Along with many other hypothetical proteins may  
242 also participate in plant stress defense mechanism [35].

243

### 244 **Identification of DEGs involved in signal transduction**

245 In *jatropha*, many of the genes involved in signal transduction were significantly up-regulated. These involve many  
246 probable LRR receptor-like serine/threonine-protein kinases, receptor-like protein kinase, receptor-like protein 12,  
247 serine/threonine-protein kinases SAPK1, Calcium-dependent protein kinase [36, 37]. This clearly implies the  
248 signaling cascade events downstream the genes involved in organogenesis. In contrary, the brassinosteroid LRR  
249 receptor like kinases were down-regulated in castor.

250

### 251 **Cell wall related genes**

252 In castor, cell wall related genes that are up-regulated include pectinesterase-2 precursor involved in the  
253 dimethylesterification of cell wall pectin, polygalacturonase non-catalytic subunit AroGP2 precursor involved in cell  
254 wall organization, beta expansin 3 in loosening of cell walls poor in pectin and xyloglucans, o-methyltransferase in  
255 monolignol biosynthesis. Down-regulated genes are non-specific lipid-transfer protein 1-like proteins which are  
256 small, basic proteins that have been reported to be involved in numerous biological processes such as transfer of  
257 phospholipids, and reproductive development. Another gene, lupeol synthase responsible for formation of the  
258 cuticular lupeol conferring characteristic surface properties of *R. communis* stems is also down-regulated.

259

### 260 **Genes involved in biosynthetic pathways**

261 In castor, some of the up-regulated genes were found to play a role in secondary metabolite biosynthesis pathways  
262 like reticuline oxidase in biosynthesis of isoquinoline alkaloid biosynthesis, cycloartenol synthase in sterol  
263 biosynthesis, muconate cycloisomerase in benzoate degradation. Flavonol synthase/flavanone 3-hydroxylase  
264 involved in flavonoid biosynthesis, sesquiterpene synthase, (R)-limonene synthase involved in monoterpene  
265 biosynthesis were down-regulated. Cytochrome P450 which is up-regulated 10-fold is involved in ursolate  
266 biosynthesis. Ursolate is a pentacyclic triterpenoic acid that occurs naturally in many plants. Thaumatin-like proteins



267 are related to highly complex gene family involved in a wide range of developmental processes in fungi, plants, and  
268 animals.

### 269 **Identification of orthologous genes group from DEGs** 270

271 In the orthologous gene analysis, a total of 67 gene groups were commonly up-regulated in all the three crops  
272 (Additional file 4: Tables S10-S12), while 1,379 genes groups were uniquely expressed in castor, 1,007 genes group  
273 in jatropha and 233 genes group in sunflower. Both castor and sunflower share 157 up-regulated genes group in  
274 common and absent in jatropha, while 280 genes group were commonly expressed only between castor and jatropha  
275 and absent in sunflower. Only 25 genes group were commonly expressed between sunflower and jatropha (Figure  
276 6). A total of nine groups were commonly down-regulated in all the three crops (Additional file 4: Tables S13-S15)  
277 while 920 genes group were uniquely down-regulated in castor, 496 genes group in jatropha and 267 genes group in  
278 sunflower. Thirty-one genes group were expressed in both castor and sunflower and absent in jatropha, while 72  
279 genes group were commonly expressed only between castor and jatropha and absent in sunflower. Only 6 genes  
280 group were commonly expressed between sunflower and jatropha. The significantly down-regulated genes group in  
281 castor include phenylpropanoid pathway genes group like jasmonate O-methyltransferase, cinnamoyl-CoA  
282 reductase, O-methyltransferase, receptor kinases like Brassinosteroid Insensitive 1-associated receptor kinase 1,  
283 homeobox protein knotted-1, hormone biosynthesis genes like somatic embryogenesis receptor kinase, auxin-  
284 responsive protein, auxin efflux carrier component, indole-3-acetic acid-amido synthetase GH3.1, GRAS13 protein,  
285 gibberellin-regulated protein 1, gibberellin receptor *GID1*, oilseed pathway genes like delta 9 desaturase,  
286 transcription factors like *WRKY* transcription factor 16, Transcription factor *TGA7*, 9-cis-epoxycarotenoid  
287 dioxygenase and cell wall related genes like glycine-rich cell wall structural protein 1, *WAT1*-related protein, etc.  
288 The significant up-regulated genes include transcription factors like *GATA* transcription factor, *R2r3-myb*  
289 transcription factor, *WRKY* transcription factor, *CBF*-like transcription factor, ethylene-responsive transcription  
290 factor, hormone biosynthesis genes like stem 28 kDa glycoprotein, gibberellin receptor *GID1*, chitin-inducible  
291 gibberellin-responsive protein, *SAUR*-like auxin-responsive protein, auxin:hydrogen symporter, stem-specific  
292 protein *tsjt1*, *DELLA* protein *GAIP-B*, phenazine biosynthesis protein, transporter genes like UDP-sugar transporter,  
293 potassium channel *KAT3*. Overall this analysis provided commonly upregulated and downregulated genes for *in-*  
294 *vitro* validation.

### 295 296 **qRT-PCR validation of DEGs**

297 Seventy-two DEGs by selecting some of the most significantly upregulated and downregulated genes were subjected  
298 to qRT-PCR analysis. Of the tested genes, primers for 10 genes failed to produce amplification. Of the remaining 52  
299 genes, qRT-PCR analysis of 48 genes was in close agreement with the RNA-Seq data. Figure 7 represents data from  
300 two each of the upregulated and downregulated genes of castor (a-d), *Jatropha* (e-h), sunflower (i-l) and other genes  
301 reported to have known function in organogenesis (m-t). Amplification was observed in all the three crops, two  
302 crops or a single crop. Perusal of the data presented in Figure 7 and additional file 5: Table S16 show that the  
303 differential expression in terms of upregulation or downregulation is consistent at all time points, (eg: Fig 7a, b, d

304 for castor); upregulated followed by downregulation (Fig. 7c, g, k for castor, jatropha and sunflower, respectively)  
305 and *vice versa* (Fig. 7j, k, i for castor, jatropha and sunflower, respectively).

306

### 307 **Discussion**

308 Callus is an unorganized, undifferentiated mass of cells with root and shoot primordials produced from a single  
309 differentiated cell and many callus cells exhibit totipotency [38, 39]. Appropriate combination of plant growth  
310 hormones in tissue culture media makes plant cells exhibit properties like cellular totipotency, developmental  
311 plasticity and subsequent regeneration into mature plants [40, 41, 42]. The ratio of auxins-to-cytokinin in the growth  
312 media primarily decides the developmental fate of a regenerating tissue *in vitro*. Usually, a higher auxin-to-cytokinin  
313 ratio favors root formation, an intermediate ratio promotes callus induction, while a high ratio of cytokinin-to-auxin  
314 promotes shoot regeneration [40]. There are two modes of regeneration for a plant cell *in vitro*; a) direct/meristem  
315 based and indirect/callus based [43]. A direct organogenesis mode does not require a de-differentiation phase  
316 wherein the explants are fully competent while callus-based regeneration involves two steps as described by Motte  
317 et al. [44]. Callus induction requires the interplay of several key regulators of auxin and cytokinins signaling  
318 pathways and spatially and temporally controlled intrinsic developmental programmes interconnected at multiple  
319 levels. Auxins mediate founder cell specification, the development of primordia and the acquisition of  
320 organogenesis competence while cytokinins assign shoot identity to the developing primordia.

321 Plant hormones act as first messengers in regulating the activity of gene *via* various signaling pathways and initiate  
322 gene expression. Although various media experimented in our tissue culture studies induced callus from cultured  
323 explants of castor with a low frequency, shoot differentiation was sporadic with low reproducibility which implies  
324 that the calli contain very few morphogenic cells interspersed in several non-morphogenic tissues. Sujatha and  
325 Reddy [45] assessed the morphogenic competence of castor tissues on several basal media supplemented with many  
326 growth regulators individually and in a broad range combination according to De Fossard et al. [46] with 81  
327 combinations of minerals, sucrose + growth factors + amino acids besides growth regulators, which revealed low  
328 caulogenic response of castor explants for direct as well as callus mediated shoot regeneration. In castor, *in vitro*  
329 propagation system based on hypocotyl derived callus cultures was developed [8]. Hence, this poor response to *in*  
330 *vitro* culture necessitated the study on understanding the genes that are transcribed in cultured tissues of castor by  
331 comparing with two other crops (jatropha and sunflower) possessing good regeneration ability through *de novo*  
332 transcriptome analysis.

333 Tissue-culture based plant cells have unique ability to reprogrammed differentiated somatic cells to de-differentiate,  
334 proliferate and re-differentiate into whole plants [47]. The gene ontology assignments of the three crops indicated  
335 that most of genes are concerned with transcription, regulation of transcription and translation indicating steady state  
336 gene expression and reprogramming differentiated cells. For plant cells to transit from callus to shoot organogenesis,  
337 they need to remodel their gene expression during which several genes associated with cell division, stress response,  
338 primary metabolism and cell wall synthesis get involved [48]. This is done by cellular dedifferentiation i.e.,  
339 acquiring cellular totipotency which makes cells re-enter into the cell cycle making remarkable changes in the

340 pattern of gene expression as cells switch from one somatic cell to a new one directing either reentry into the cell  
341 cycle, cell death, or trans- or dedifferentiation.

342 The calli or very young primordials can respond to signals that direct the formation of an organ [49, 50, 51]. A cross  
343 talk between auxins and cytokinins is required for patterning of the shoot primordium and the shoot meristem [52,  
344 53, 54, 55]. Auxin is very important for positioning of root stem cell niche, shoot and root organogenesis [55, 56,  
345 57]. In castor, auxin-induced protein 15A and Indole-3-acetic acid-induced protein ARG7 that belong to a large  
346 auxin responsive gene family, SAURs (Small Auxin Up RNA) [58] were down-regulated 5-folds while IAA-amino  
347 acid hydrolase ILR1-like 3 was upregulated. These genes are involved in tryptophan dependent IAA biosynthesis.  
348 Indole-3-acetic acid (IAA) is the most abundant naturally occurring auxin in plants that is required throughout the  
349 development process. These auxin levels are regulated naturally by forming IAA (Indole-3-acetic acid) conjugates  
350 with some of the amino acids. IAA is the most abundant naturally occurring auxin in plants which acts in every  
351 aspect of plant development. IAA-amino acid hydrolase ILR1-like 3 is an enzyme which cleaves the conjugates and  
352 releases free IAA. Enhanced expression of this enzyme in castor might be one of the reasons for making IAA  
353 available in castor cells favoring callus and root growth instead of shoot differentiation [42, 59]. Another gene,  
354 auxin-induced protein 5NG4, putative, which is highly and specifically induced by auxin in juvenile shoots prior to  
355 adventitious root formation exhibited down-regulation indicating insufficient synthesis of IAA necessary for shoot  
356 initiation. Further, down-regulation of genes that play a major role in maintaining auxin homeostasis like WAT1  
357 (Wall associated thinness), vacuolar transporter genes inhibit the development of cell wall components and hence,  
358 shoot and root morphogenesis. After auxins, high cytokinin levels determine the shoot identity of the organ  
359 primordia by establishing a shoot stem cell niche [60]. A first prerequisite for shoot formation is that the cytokinins  
360 from the shoot induction media reach the cells that have acquired organogenic competence. Histidine-containing  
361 phosphotransfer protein is involved in biosynthesis of the cytokinin, zeatin. These cytokinins are responsible for  
362 cell division and shoot initiation. It is down-regulated 4-fold in castor. In jatropha, auxin transporter-like protein 3  
363 which is a carrier protein involved in proton-driven auxin influx mediates the formation of auxin gradient from  
364 developing leaves (site of auxin biosynthesis) to tips. These auxin influx and efflux carriers maintain local auxin  
365 maxima, essential for shoot regeneration [61, 62]. Up-regulation of some of the genes like Xyloglucan  
366 endotransglucosylase/hydrolase synthesizing xyloglucan polymers, essential constituent of the primary cell wall,  
367 participating in cell wall construction of growing tissues and 14 kDa proline-rich protein DC2.15 initiating  
368 embryogenesis might be responsible for higher regeneration potential in jatropha.

369 In Arabidopsis, Wuschel protein which is a homeobox transcription factor is expressed during embryogenesis and  
370 organogenesis leading to the proliferation of meristematic tissue from vegetative organs. Localized expression of  
371 this protein is considered as a reliable marker for shoot regeneration in Arabidopsis [51] and Medicago [63].  
372 However, in the present study, activity of Wuschel protein is lowered 3 and 7-folds (Additional file 5: Table S16)  
373 by the 14<sup>th</sup> and 21<sup>st</sup> day of culture, respectively implying less regeneration potential. Li et al. [14] correlated WUS  
374 expression with the budding rate from castor epicotyls and found that the expression varied with concentration of the  
375 cytokinin and the pre-treatment duration. While in the present study, WUS expression was found to drastically  
376 decline in the dedifferentiated tissue. NAC proteins are one of the largest groups of plant-specific transcription

377 factors and are known to play essential roles in various developmental processes, auxin signaling and postembryonic  
378 shoot meristem formation [64]. Protein short root like is a transcription factor required for quiescent center cells  
379 specification and maintenance of surrounding stem cells and for the asymmetric cell division involved in radial  
380 pattern formation in roots. It regulates the radial organization of the shoot axial organs and is required for normal  
381 shoot gravitropism [65]. Hence, the down-regulation of these transcription factors also could have contributed to  
382 recalcitrance in castor. Transcription factors of the Apetala2/Ethylene Response Factor (AP2/ERF) family like  
383 wound-induced dedifferentiation 1 (WIND1) were found to trigger cell dedifferentiation and proliferation leading to  
384 callus formation [66]. This clearly shows that auxin perception and the activation of several auxin signaling modules  
385 simultaneously is required for shoot organogenesis. Hence, the defects in auxin signaling would probably cause  
386 regeneration recalcitrance.

387 Protein kinases are enzymes that catalyze the transfer of phosphate groups from a nucleoside triphosphate to amino  
388 acids such as serine and threonine or histidine residues present in plant proteins thereby modulating the properties.  
389 The receptor kinase activation is the starting point of the signaling cascade mediating developmental  
390 switches/hormone responses; it represents an important regulatory control point. In jatropha, up-regulation of these  
391 protein kinases lead to active signaling for shoot organogenesis. Probable LRR receptor-like serine/threonine-protein  
392 kinase, together with RPK2 is required for pattern formation along the radial axis i.e., the apical embryonic domain  
393 cell types that generate cotyledon primordia and the apical-basal axis. Other significant proteins like EXORDIUM-  
394 like 2 protein plays an important role in brassinosteroid-dependent regulation of plant growth and development,  
395 Thaumatin-like proteins are related to highly complex gene family involved in a wide range of developmental  
396 processes in fungi, plants, and animals, alpha carbonic anhydrase 1, chloroplastic-like carry inorganic carbon for  
397 actively photosynthesizing cells [67]. Phospholipase A1-II 1-like proteins are major digestive enzymes and play a  
398 critical role in most physiological processes including the generation of numerous signaling lipids.

399

## 400 **Conclusions**

401 Overall this study deals with organogenic differentiation *in vitro* in three oilseed crops; castor, jatropha and  
402 sunflower, castor proved to be highly recalcitrant to *in vitro* manipulations despite research over the past three and  
403 half decades and showed extremely low percentage of caulogenic ability from the induced callus and successive  
404 plant regeneration. Hence, the investigations undertaken to unravel the reason for recalcitrance in castor using  
405 transcriptomic analysis revealed the prime reasons to be the imbalance in auxin metabolism, leading to insufficient  
406 accumulation of auxins essential for shoot regeneration. Further, transcription factors like Wuschel responsible for  
407 promoting shoot regeneration, protein short root like contributing shoot organogenesis and histidine containing  
408 phosphotransfer protein involved in cytokinin biosynthesis for promoting shoot regeneration are down-regulated.  
409 Strikingly, there were no signaling cascades activated to promote any shoot regeneration as there seems to be down-  
410 regulation of Brassinosteroid LRR receptor kinases. Noticeably, many secondary metabolite synthesis genes were  
411 up-regulated in castor. While, looking into the expression patterns of jatropha, many kinases involving in signal  
412 transduction were up-regulated indicating a possible role in shoot organogenesis processes besides those involved in  
413 cellular processes. In addition, auxin and cytokinin biosynthesis genes were also up-regulated. In sunflower, most of

414 the genes expressed belong to those involved in cellular processes, biochemical pathways and photosynthesis. The  
415 interplay between type, amount and timing of growth regulators stimulating genes encoding proteins for hormone  
416 synthesis, transport and signaling and their positive and negative regulations play a major role in organogenesis  
417 response. Hence, the negative regulatory mechanisms in castor and positive regulation in jatropha and sunflower  
418 may be attributed for the major differences in organogenic response observed in this investigation. Our data  
419 complements further investigations and gene validations on a broader panel of genotypes and tissues cultured on  
420 media with different growth regulators for overcoming the problem of recalcitrance *in vitro* in castor.

421

## 422 **Methods**

### 423 **Plant material and culture conditions**

424 The seeds of the three oilseed crops; castor, sunflower and jatropha were obtained from ICAR-Indian Institute of  
425 Oilseeds Research (IIOR), Hyderabad and the varieties used were DCS-107 for castor, DRSH-1 for sunflower and  
426 JP-2 for jatropha.

427

### 428 **Tissue culture studies**

429 Decoated seeds from all the three crops were surface sterilized and inoculated on ½ strength Murashige and Skoog  
430 [68] media for germination and growth. From these seedlings, explants like root, hypocotyl, cotyledonary leaf and  
431 primary leaf were taken, cut into 0.5 cm size and inoculated onto MS agar medium supplemented with different  
432 concentrations and combinations of growth regulators [benzyladenine (BA) + naphthaleneacetic acid (NAA); 2,4,  
433 dichlorophenoxyacetic acid (2,4-D) + kinetin (KN); BA+2,4-D+NAA; thidiazuron (TDZ) singly or in combination  
434 of 2-isopentenyl adenine (2-iP) with auxins NAA or indole-3-butyric acid (IBA) or indole-3-acetic acid (IAA)] for  
435 callus induction and shoot regeneration. The inoculated cultures were maintained at  $27 \pm 1$  °C under a 16/8 hr  
436 light/dark photoperiod with light intensity of  $30 \mu\text{mol m}^{-2} \text{s}^{-1}$ . Of the various media combinations tested, good  
437 regenerable callus was observed on medium supplemented with 2.0 mg/l 2-iP+0.1 mg/l TDZ+0.5 mg/l IAA from  
438 hypocotyl explants in castor and jatropha and cotyledonary explants of sunflower. A common medium was selected  
439 for the three crops to minimize the differences in gene expression due to exogenous growth regulators. After culture  
440 initiation the callus was collected at 0<sup>th</sup> day known as control samples (CC, JC, SC) and 7<sup>th</sup>, 14<sup>th</sup> and 21<sup>st</sup> days calli  
441 were pooled for organogenesis study and denoted as cultured samples (C-SD, J-SD, S-SD) of castor, sunflower and  
442 jatropha.

443

### 444 **Total RNA extraction from samples**

445 Three biological replicates of callus tissue and regenerating explants (about 50-100 mg) were collected from control  
446 and cultured hypocotyl explants in castor and jatropha and from cotyledonary explants in sunflower. Further, all  
447 samples were washed with DEPC water and immediately frozen at -80 °C. The tissue was crushed into fine powder  
448 in liquid nitrogen and RNA was isolated as described in Qiagen RNA extraction kit. The quality of RNA was  
449 checked on 1% agarose gel and evaluated on Nanodrop ND 1000 spectrophotometer (Genway, USA). After

450 ensuring the quality (1.8-2.0 at  $A_{260}/A_{280nm}$ ) and concentration (250-300 ng/ $\mu$ l), total RNA were used for library  
451 preparation.

452

### 453 **Library construction and RNA-sequencing**

454 Quality of extracted total RNA was assessed using Agilent 2100 Bioanalyzer. Those having RNA Integrity Number  
455 (RIN) value  $\geq 8$  is considered as good quality. Approximately 4  $\mu$ g of total RNA was used to prepare the RNA-seq  
456 library using the TruSeq RNA Sample Prep Kits (Illumina) as per the kit protocol. In short, poly-A containing  
457 mRNA molecules were purified using poly-T oligo-attached magnetic beads. Following purification, the mRNA was  
458 fragmented into small pieces using divalent cations under elevated temperature. The cleaved RNA fragments were  
459 used to synthesize first strand cDNA using reverse transcriptase and random primers followed by second strand  
460 cDNA synthesis using DNA polymerase I and RNase H. These cDNA fragments were subjected to an end repair  
461 process with the addition of a single 'A' base, and then ligation of the adapters. The products were purified, and  
462 PCR enriched to create the final cDNA library. Bioanalyzer plots were used at every step to assess mRNA quality,  
463 enrichment success, fragmentation sizes, and final library sizes. Both Qubit and qPCR were used for measuring the  
464 quantity of the library before sequencing. After the libraries were constructed, they were sequenced on HiSeq-2500  
465 to obtain 2 x100 bp paired ends having 40 million high quality reads/sample. The parameters used to check the  
466 quality depend on the base quality distribution, average base content per read and GC distribution.

467

### 468 ***De novo* transcriptome assembly**

469 Fastq files of all samples (control and cultured) were preprocessed before performing the assembly. The adapter  
470 sequences were trimmed, and the reads were also filtered out wherever the average quality score was less than 20 in  
471 any of the paired end reads. The high-quality reads were then assembled using Trinity v2.02 [69] with default  
472 options. Redundancy of the transcript fragments were minimized using cdhit-est v4.6 [70]. The GC content  
473 distribution of all the assembled transcripts was calculated. Transcripts of length  $\geq 200$  bp were found ideal and  
474 considered for transcript expression estimation and downstream annotations. The transcriptome sequences of control  
475 and cultured samples of castor, jatropha and sunflower as raw reads are submitted to NCBI and can be accessed with  
476 the NCBI accession number PRJNA415556.

477

### 478 **Gene expression estimation**

479 The trimmed reads were aligned to the assembled transcriptome (length  $\geq 200$  bp) using Bowtie2 program v2-2.2.6  
480 [71]. We allowed up to 1-mismatches in the seed region (length = 31 bp) and all multiple mapped positions were  
481 reported. Of all filtered reads, about ~94% of reads from each sample were properly aligned back to the assembled  
482 transcriptome.

483

### 484 **Differential gene expression analysis**

485 Following transcript alignment, differential gene expression analysis was performed using edgeR program [72] for  
486 identification of genes that were up-regulated and down-regulated in each crop during tissue culture-based

487 regeneration. Levels of gene expression were represented as log<sub>2</sub> ratio of transcript abundance between control and  
488 cultured samples. Differentially expressed genes identified in control and cultured samples were analyzed by  
489 hierarchical clustering. A heat map was constructed using the log-transformed and normalized value of genes based  
490 on Pearson uncentered correlation distance as well as based on complete linkage method.

491  
492 **Annotation of differentially expressed transcripts**  
493 The assembled transcripts were annotated using in-house pipeline (CANoPI – Contig Annotator Pipeline,  
494 unpublished) for *de novo* transcriptome assembly. Assembled transcripts were compared with NCBI plant non-  
495 redundant protein database using BLASTX program. Matches with an E-value cutoff of 10<sup>-5</sup> and % identity cutoff of  
496 40% were retained for further annotation. The top significant blast for each of the transcripts was considered for  
497 annotation and each of the differentially expressed transcripts were annotated and the organism name was extracted.  
498 The predicted proteins from BLASTX were annotated against NCBI plant redundant database, UniProt database and  
499 pathway information from other databases like Plant Metabolites Network database. Furthermore, gene ontology  
500 (GO) terms for transcripts were extracted wherever possible based on UniProt database. GO terms were mapped to  
501 molecular function, biological process and cellular components. Finally, the orthologs gene groups among all  
502 upregulated and downregulated DEGs were identified using OrthoMCL Tool [73].

503  
504 **Quantitative real time-PCR (qRT-PCR)**  
505 For validation of RNA-Seq data through qRT-PCR, 72 differentially expressed genes obtained from the three crops  
506 were selected and the forward and reverse primer sequences along with the resultant amplicon sizes are presented in  
507 Additional file 5: Table S16. The sequences were blasted in NCBI, the consensus sequences for the three crops  
508 were derived in Clustal W and primers were designed using Primer3Plus software. For qRT-PCR studies, explants  
509 cultured for 7, 14 and 21 days along with control from the three crops were used totaling 12 samples per replicate  
510 and each experiment included three biological replicates. The total RNA was isolated, and first strand cDNA was  
511 synthesized using one µg of RNA with Super Script III first-strand synthesis kit (Invitrogen, USA) from which one  
512 µl of 1:10 diluted cDNA was used as template for qRT-PCR. The qRT-PCR reactions were performed on a Light  
513 Cycler 96 System (Roche, USA) using the SYBR premix ExTaq™ II (Takara, Japan) in 96-well optical reaction  
514 Roche plates. Each reaction contained 5 µl SYBR Green Master, 0.8 µl template cDNA, 0.4 µl each of the primers  
515 (10 µM), and 3.4 µl RNase-free water in a total volume of 10 µl. The qRT-PCR profile was as follows, 95 °C (2  
516 min), 40 cycles of 95 °C (5 s), 60 °C (30 s) with fluorescent signal recording and 72 °C for 30 s. The melting curve  
517 was obtained using a high-resolution melting profile performed after the last PCR cycle, 95 °C for 15 s followed by  
518 a constant increase in the temperature between 65 °C (15 s) and 95 °C (1 s). The actin gene served as an endogenous  
519 control for normalization, and relative fold-changes of the differentially expressed genes were calculated using the  
520  $\Delta\Delta$  cycle threshold (CT) method ( $2^{-\Delta\Delta C_T}$  treatment –  $\Delta C_T$  control) according to Livak and Schmittgen [74].

521  
522 **Abbreviations**  
523 **BA:** N<sup>6</sup>-Benzyladenine

524 **BP:** Biological processes  
525 **CC:** Cellular components  
526 **CPM:** Counts per million  
527 **2,4-D:** 2,4-dichlorophenoxyacetic acid  
528 **DEG:** Differentially expressed genes/transcripts  
529 **FPKM:** Fragments per kilobase per million mapped fragments  
530 **GO:** Gene ontology  
531 **IAA:** Indoleacetic acid  
532 **2-iP:** 2-isopentenyladenine  
533 **KN:** kinetin  
534 **MF:** Molecular function  
535 **MS:** Murashige and Skoog  
536 **NAA:**  $\alpha$ -Naphthaleneacetic acid  
537 **TDZ:** 1-Phenyl-3-(1,2,3-thiadiazol-5-yl) urea (thidiazuron)

538

#### 539 **Declarations**

540

541 **Ethics approval and consent to participate:** Not applicable

542

543 **Consent for publication:** Not applicable

544

545 **Availability of data and material:** The datasets generated and analysed during the current study are available in  
546 NCBI and can be accessed with NCBI accession number PRJNA415556.

547

548 **Competing interests:** The authors declare that they have no competing interests.

549

550 **Funding:** The work was carried out at ICAR-IIOR without any funding support.

551

552 **Authors' contributions:** SSP was involved in tissue culture work, RNA isolation and manuscript preparation; TM  
553 in tissue culture experiments, data recording, RNA isolation, qRT-PCR experiments; PAVT in data interpretation,  
554 analysis and draft manuscript preparation; KOA in supervision and guidance, finalization of the technical  
555 programme; NC, SG, VKV, KMAVSK, SPL, BK, RVBL in sequencing, transcriptome analysis, bioinformatic  
556 analysis, data interpretation and manuscript preparation; SM in conceiving the idea, work plan, interpretation, data  
557 analysis and manuscript preparation. All authors read and approved the final manuscript.

558

559 **Acknowledgements:** SSP, TM and SM thank the Director, ICAR-IIOR for providing the necessary facilities for  
560 carrying out the research work.



561

562 **References**

- 563 1. Weiss EA. Oilseed Crops. 2<sup>nd</sup> Ed, Blackwell Science; 2000.
- 564 2. Hegde DM, Sujatha M, Singh NB. Castor in India. Directorate of Oilseeds Research, Hyderabad, India; 2003.
- 565 3. Lord JM, Roberts LM, Robertus JD. Ricin: structure, mode of action and some current applications. FASEB J.
- 566 1994;8:201-8.
- 567 4. Sujatha M, Sailaja M. Stable genetic transformation of castor (*Ricinus communis* L.) via *Agrobacterium*
- 568 *tumefaciens*-mediated gene transfer using embryo axes from mature seeds. Plant Cell Rep. 2005;23:803-10.
- 569 5. Sharma V, Kundu PP. Addition polymers from natural oils A review. Prog Polym Sci. 2006;31:983–1008.
- 570 6. Malathi B, Ramesh S, Rao KV, Reddy VD. *Agrobacterium*-mediated genetic transformation and production of
- 571 semilooper resistant transgenic castor (*Ricinus communis* L.). Euphytica. 2006;147:441-9.
- 572 7. Zhang C, Frias MA, Mele A, Ruggiu M, Eom T, Marney CB, et al. Integrative modeling defines the Nova
- 573 splicing-regulatory network and its combinatorial controls. Science. 2010;329:439–43.
- 574 8. Zalavadiya VK, Mehta DR, Javia RM, Padhiyar SM Madariya RB. Somatic organogenesis and plant regeneration
- 575 in castor (*Ricinus communis* L.). Asian J Biol Sci. 2014;9:43–52.
- 576 9. Athma P, Reddy TP. Efficiency of callus initiation and direct regeneration from different explants of castor
- 577 (*Ricinus communis* L.). Curr Sci. 1983;52:256–7.
- 578 10. Sujatha M, Reddy TP. Differential cytokinin effects on the stimulation of *in vitro* shoot proliferation from
- 579 meristematic explants of castor (*Ricinus communis* L.). Plant Cell Rep. 1998;17:561–6.
- 580 11. Ahn YJ, Vang L, McKeon TA, Chen GQ. High-frequency plant regeneration through adventitious shoot
- 581 formation in castor (*Ricinus communis* L.). In Vitro Cell Dev Biol Plant. 2007;43:9–15.
- 582 12. Alam I, Sharmin SA, Mondal SC, Alam MJ, Khalekuzzaman M, Anisuzzaman M, et al. *In vitro*
- 583 micropropagation through cotyledonary node culture of castor bean (*Ricinus communis* L.). Aust J Crop Sci
- 584 2010;4:81–4.
- 585 13. Kansara RV, Jha S, Jha SK, Mahatma MK. An efficient protocol for *in vitro* mass propagation of fusarium wilt
- 586 resistant castor (*Ricinus communis* L.) parental line SKP-84 through apical meristem. The Bioscan 2013;8:403-8.
- 587 14. Li W, Li Z, Zhai Y, Wang C. A highly efficient castor regeneration system identified through WUSCHEL
- 588 expression. Chem Eng Trans. 2015;46:1393-8.
- 589 15. Ganesh Kumari K, Ganesan M, Jayabalan N. Somatic organogenesis and plant regeneration in *Ricinus*
- 590 *communis*. L. Biol Plant. 2008;52:17-25.
- 591 16. Che P, Lall S, Nettleton D, Howell SH. Gene expression programs during shoot, root, and callus development in
- 592 Arabidopsis tissue culture. Plant Physiol 2006;141:620–37.
- 593 17. Gautheret RJ. Factors affecting differentiation of plant tissues grown *in vitro*. In: Beerman W, Nieuwkoop PD,
- 594 Wolff E (eds) Cell Differentiation and Morphogenesis. North-Holland Publishing, Amsterdam; 1966. P. 55–95.
- 595 18. Hicks GS. Patterns of organ development in plant tissue culture and the problem of organ determination. Bot
- 596 Rev. 1980;46:1–23.

- 597 19. Christianson ML, Warnick DA. Temporal requirement for phytohormone balance in the control of  
598 organogenesis *in vitro*. Dev Biol 1985;112:494–7.
- 599 20. Valvekens D, Montagu MV, Lijsebetens MV. *Agrobacterium tumefaciens*-mediated transformation  
600 of *Arabidopsis thaliana* root explants by using kanamycin selection. Proc Natl Acad Sci USA. 1988;85:5536–40.
- 601 21. Ozawa S, Yasutani I, Fukuda H, Komamine A, Sugiyama M. Organogenic responses in tissue culture of *srd*  
602 mutants of *Arabidopsis thaliana*. Dev. 1998;125:135–42.
- 603 22. Cary A, Uttamchandani SJ, Smets R, Van Onckelen HA, Howell SH. Arabidopsis mutants with increased organ  
604 regeneration in tissue culture are more competent to respond to hormonal signals. Planta. 2001;213:700–7.
- 605 23. Brown AP, Kroon JTM, Swarbreck D, et al. Tissue-specific whole transcriptome sequencing in castor, directed  
606 at understanding triacylglycerol lipid biosynthetic pathways PLoS ONE. 2012;7(2):e30100.  
607 doi:10.1371/journal.pone.0030100
- 608 24. Xu G, Huang J, Yang Y, Yao Y. Transcriptome analysis of flower sex differentiation in *Jatropha curcas* L. using RNA sequencing.  
609 PLoS ONE. 2016;11(2):e0145613. doi:10.1371/journal.pone.0145613.
- 610 25. Pan BZ, Chen MS, Ni J, Xu ZF. Transcriptome of the inflorescence meristems of the biofuel plant *Jatropha*  
611 *curcas* treated with cytokinin. BMC Genomics. 2014;15:974. doi:10.1186/1471-2164-15-974.
- 612 26. Tan M, Xue J, Wang L, Huang J, Fu C, Yan X. Transcriptomic analysis for different sex types of *Ricinus*  
613 *communis* L. during development from apical buds to inflorescences by digital gene expression profiling. Front  
614 Plant Sci. 2015;6:1208.
- 615 27. Sujatha M, Nithianantham S, Reddy MP. Plant regeneration and genetic transformation in *Jatropha*. In: Jain SM,  
616 Dutta Gupta S (Eds) Biotechnology of Neglected and Underutilized Crops. Springer Publishers, 2013. P. 319-42.
- 617 28. Sujatha M, Vijay S, Vasavi S, Sivaraj N, Chander Rao S. Combination of thidiazuron and 2-isopentenyladenine  
618 promotes highly efficient adventitious shoot regeneration from cotyledons of mature sunflower (*Helianthus*  
619 *annuus* L.) seeds. Plant Cell Tiss Organ Cult. 2012;111:359-72.
- 620 29. Wang Z, Gerstein M, Snyder M. RNA-Seq: A revolutionary tool for transcriptomics. Nat Rev Genet.  
621 2009;10:57–63.
- 622 30. Gupta S, Kumari M, Kumar H, Varadwaj PK. Genome-wide analysis of miRNAs and Tasi-RNAs in *Zea mays* in  
623 response to phosphate deficiency. Funct Integr Genomics. 2017;17:335-51.
- 624 31. Gupta S, Gupta V, Singh V, Varadwaj PK. Extrapolation of significant genes and transcriptional regulatory  
625 networks involved in *Zea mays* in response in UV-B stress. Genes Genomics. 2018a;1-18.
- 626 32. Prasad CVSS, Gupta S, Gaponenko A, Dhar M. *In-silico* comparative study of inhibitory mechanism of plant  
627 serine proteinase inhibitors. Bioinformation. 2012;8(14):673.
- 628 33. Gupta S, Rao AR, Varadwaj PK, De S, Mohapatra T. Extrapolation of inter domain communications and  
629 substrate binding cavity of camel HSP70 1A: a molecular modeling and dynamics simulation study. PloS One  
630 2015b;10(8):e0136630.
- 631 34. Prasad CS, Gupta, S, Gaponenko A, Tiwari M. Molecular dynamic and docking interaction study of *Heterodera*  
632 *glycines* serine proteinase with *Vigna mungo* proteinase inhibitor. Appl Biochem Biotechnol.  
633 2013a;170(8):1996-2008.

- 634 35. Gupta S, Singh Y, Kumar H, Raj U, Rao AR, Varadwaj PK. Identification of novel abiotic stress proteins in  
635 *Triticum aestivum* through functional annotation of hypothetical proteins. J Comput Interdiscip Sci.  
636 2018b;10(1):205-20.
- 637 36. Prasad CS, Gupta S, Kumar H, Tiwari M. Evolutionary and functional analysis of fructose bisphosphate aldolase  
638 of plant parasitic nematodes. Bioinformation. 2013b;9(1):1.
- 639 37. Gupta S, Jadaun A, Kumar H, Raj U, Varadwaj PK, Rao AR. Exploration of new drug-like inhibitors for  
640 serine/threonine protein phosphatase 5 of *Plasmodium falciparum*: a docking and simulation study. J Biomol  
641 Struct Dyn. 2015a;33(11):2421-41.
- 642 38. Steward FC, Mapes MO, Mears K. Growth and organized development of cultured cells. II. Organization in  
643 cultures grown from freely suspended cells. Amer J Bot. 1958;45:705-8.
- 644 39. Nagata T, Takebe I. Plating of isolated tobacco mesophyll protoplasts on agar medium. Planta, 1971;99:12-20.
- 645 40. Skoog F, Miller CO. Chemical regulation of growth and organ formation in plant tissue cultured *in vitro*. Symp  
646 Soc Exp Biol. 1957;11:118-30.
- 647 41. Steward FC, Mapes MO, Kent AE, Holsten RD. Growth and development of cultured plant cells. Science.  
648 1964;143:20-7.
- 649 42. Gupta S, Raj U, Kumar H, Varadwaj PK, Gupta A. Embryo and endosperm specific comparative transcriptome  
650 analysis of *Triticum aestivum* in response to ABA and H<sub>2</sub>O<sub>2</sub> stress. In International Conference on  
651 Bioinformatics and Systems Biology (BSB); 2016. p. 1-4.
- 652 43. Bhojwani SS, Razdan MK. Plant Tissue Culture: Theory and Practice, Volume 5. Elsevier Science Publishers,  
653 Netherlands; 1996.
- 654 44. Motte H, Vereecke D, Geelen D, Werbrouck S. The molecular path to *in vitro* shoot regeneration. Biotechnol  
655 Adv. 2014;32:107-21.
- 656 45. Sujatha M, Reddy TP. Promotive effect of lysine monohydrochloride on morphogenesis in cultured seedling and  
657 mature plant tissues of castor (*Ricinus communis* L.). Indian J Crop Sci. 2007;2:279-86.
- 658 46. De Fossard RA, Myint A, Lee ECM. A broad spectrum tissue culture experiment with tobacco (*Nicotiana*  
659 *tabacum*) pith tissue callus. Physiol Plant. 1974;30:125-30.
- 660 47. Qiao M, Zhao Z, Song Y, Liu Z, Cao L, Yu Y, et al. Proper regeneration from *in vitro* cultured *Arabidopsis*  
661 *thaliana* requires the microRNA-directed action of an auxin response factor. Plant J. 2012;71:14-22.
- 662 48. Zhu H, Tu L, Jin S, Xu L, Tan J, Deng F, et al. Analysis of genes differentially expressed during initial cellular  
663 dedifferentiation in cotton. Chinese Sci Bull. 2008;53:3666-76.
- 664 49. Sugiyama M. Organogenesis *in vitro*. Curr Opin Plant Biol. 1999;2:61-4.
- 665 50. Cary AJ, Che P, Howell SH. Developmental event and shoot meristem gene expression pattern during shoot  
666 development in *Arabidopsis thaliana*. Plant J. 2002;32:867-7.
- 667 51. Che P, Lall S, Howell SH. Developmental steps in acquiring competence for shoot development in *Arabidopsis*  
668 tissue culture. Planta. 2007;226:1183-94.
- 669 52. Gordon SP, Heisler MG, Reddy GV, Ohno C, Das P, Meyerowitz EM. Pattern formation during *de novo*  
670 assembly of the *Arabidopsis* shoot meristem. Dev. 2007;134:3539-48.

- 671 53. Zhao Y. Auxin biosynthesis and its role in plant development. *Annu Rev Plant Biol.* 2010;61:49–64.
- 672 54. Besnard F, Vernoux T, Hamant O. Organogenesis from stem cells *in planta*: multiple feedback loops integrating  
673 molecular and mechanical signals. *Cell Mol Life Sci.* 2011;68:2885–906.
- 674 55. Cheng ZJ, Wang L, Sun W, Zhang Y, Zhou C, Su YH, et al. Pattern of auxin and cytokinin responses for shoot  
675 meristem induction results from the regulation of cytokinin biosynthesis by AUXIN RESPONSE  
676 FACTOR3. *Plant Physiol.* 2013;161:240–51.
- 677 56. Benkova E, Michniewicz M, Sauer M, Teichmann T, Seifertova D, Jurgens G, et al. Local, efflux-dependent  
678 auxin gradients as a common module for plant organ formation. *Cell.* 2003;115:591–602.
- 679 57. Aida M, Beis D, Heidstra R, Willemsen V, Blilou I, Galinha C, et al. The *PLETHORA* genes mediate patterning  
680 of the Arabidopsis root stem cell niche. *Cell.* 2004;119:109–20.
- 681 58. Hagen G, Guilfoyle T. Auxin-responsive gene expression: Genes, promoters and regulatory factors. *Plant Mol*  
682 *Biol.* 2002;49:373–85.
- 683 59. Bartel B, LeClere S, Magidin M, Zolman BK. Inputs to the active indole-3-acetic acid pool: *de novo* synthesis,  
684 conjugate hydrolysis, and indole-3-butyric acid b-oxidation. *J Plant Growth Regul.* 2001;20:198–216.
- 685 60. Gordon SP, Chickarmane VS, Ohno C, Meyerowitz EM. Multiple feedback loops through cytokinin signaling  
686 control stem cell number within the *Arabidopsis* shoot meristem. *Proc Natl Acad Sci USA.* 2009;106:16529–34.
- 687 61. Rosquete MR, Barbez E, Kleine-Vehn J. Cellular auxin homeostasis: gatekeeping is housekeeping. *Mol Plant.*  
688 2012;5:772–86.
- 689 62. Lofke C, Zwiewka M, Heilmann I, Van Montagu MCE, Teichmann T, Friml J. Asymmetric gibberellin signaling  
690 regulates vacuolar trafficking of PIN auxin transporters during root gravitropism. *Proc Natl Acad Sci USA.*  
691 2013;110:3627–32.
- 692 63. Chen SK, Kurdyukov S, Kerezst A, Wang XD, Gresshoff PM, Rose RJ. The association of homeobox gene  
693 expression with stem cell formation and morphogenesis in cultured *Medicago truncatula*. *Planta.* 2009;230:827-  
694 40.
- 695 64. Hibara K, Karim MR, Takada S, Taoka K, Furutani M, Aida M, et al. *Arabidopsis* CUP-SHAPED  
696 COTYLEDON3 regulates postembryonic shoot meristem and organ boundary formation. *Plant Cell.*  
697 2006;18:2946–57.
- 698 65. Helariutta Y, Fukaki H, Wysocka-Diller J, Nakajima K, Jung J, Sena G. The SHORT-ROOT gene controls  
699 radial patterning of the Arabidopsis root through radial signaling. *Cell.* 2000;101:555–67.
- 700 66. Iwase A, Mitsuda N, Koyama T, Hiratsu K, Kojima M, Arai T, et al. The AP2/ERF transcription factor WIND1  
701 controls cell dedifferentiation in Arabidopsis. *Curr Biol.* 2011;21:508–14.
- 702 67. Mitra M, Lato SM, Ynalvez RA, Xiao Y, Moroney JV. Identification of a chloroplast carbonic anhydrase in  
703 *Chlamydomonas reinhardtii*. *Plant Physiol.* 2004;135:173–82.
- 704 68. Murashige T, Skoog F. A revised medium for rapid growth and bioassays with tobacco tissue cultures. *Physiol*  
705 *Plant.* 1962;15:473–97.
- 706 69. Grabherr MG, Haas BJ, Yassour M, Levin JZ, Thompson DA, Amit I, et al. Full-length transcriptome assembly  
707 from RNA-seq data without a reference genome. *Nat Biotechnol.* 2011;29:644-52.

- 708 70. Li W, Jaroszewski L, Godzik A. Clustering of highly homologous sequences to reduce the size of large protein  
709 database. *Bioinformatics*. 2001;17:282-3.
- 710 71. Langmead B, Salzberg S. Fast gapped-read alignment with Bowtie 2. *Nature Meth*. 2012;9:357-59.
- 711 72. Robinson MD, McCarthy DJ, Smyth GK. edgeR: a Bioconductor package for differential expression analysis of  
712 digital gene expression data. *Bioinformatics*. 2010;26:139-40.
- 713 73. Fischer S, Brunk BP, Chen F, Gao X, Harb OS, Iodice JB, et al. Using OrthoMCL to assign proteins to  
714 OrthoMCL-DB groups or to cluster proteomes into new Ortholog groups. *Current Prot Bioinform*. 2011;6-12.
- 715 74. Livak KJ, Schmittgen TD. Analysis of relative gene expression data using realtime quantitative PCR and the 2-  
716  $\Delta\Delta C_T$  method. *Meth*. 2001;25:402-8.
- 717

718 **Figure legends**

719

720 **Fig. 1** Callus types observed in castor tissues cultured on medium with different combinations of growth regulators.

721 a) Shoot-like structures were observed when leaves were inoculated on medium with 0.5 mg/l BA+1.0 mg/l NAA,

722 b) nodular green callus from cotyledon explants on medium with 0.5 mg/l TDZ+1.0 mg/l 2-iP+1.0 mg/l NAA, c)

723 organogenic callus from hypocotyls on medium supplemented with 0.2 mg/l 2,4-D+2.0 mg/l KN, d) brownish green

724 callus from roots on medium with 0.2 mg/l BA+0.2 mg/l 2,4-D, e) green soft callus from the leaf explants on media

725 supplemented with 1.0 mg/l TDZ+0.5 mg/l NAA, f) brown nodular callus from cotyledons inoculated on medium

726 with 5.0 mg/l TDZ+2.0 mg/l 2-iP +1.0 mg/l IBA, g) green nodular callus from cotyledons on medium with 2.0 mg/l

727 TDZ+0.1 mg/l IBA, h) Good callus observed from leaf explants inoculated on medium with 0.5 mg/l BA+5.0 mg/l

728 2,4-D + 0.1 mg/l NAA, i) green nodular and regenerable type of callus observed from hypocotyls on medium with

729 2.0 mg/l 2-iP+0.1 mg/l TDZ+0.5 mg/l IAA.

730 **Fig. 2** Response of hypocotyls of castor and jatropha and cotyledons of sunflower cultured on medium

731 supplemented with 2.0 mg/l 2-iP+0.1 mg/l TDZ+0.5 mg/l IAA at various time intervals. a, b, c, d represent 0, 7, 14

732 and 21 days of culture for each of the crops.

733 **Fig. 3** Differentially expressed genes (DEGs) categorized according to log<sub>2</sub> Fold Change (FC) values for (a) castor,

734 (b) jatropha, and (c) sunflower.

735 **Fig. 4** MA plots of differentially expressed genes (DEGs) categorized according to count per million (CPM) values

736 for (a) castor, (b) jatropha, and (c) sunflower.

737 **Fig. 5** Significant enriched Gene Ontology (GO) terms associated with different (a) biological processes, (b)

738 molecular functions, and (c) cellular components. GO terms have been represented for castor, jatropha and

739 sunflower in different colours below each category of the figure.

740 **Fig. 6** Venn diagram indicates the common and unique orthologues groups identified for (a) upregulated, (b)

741 downregulated DEGs from castor, jatropha and sunflower.

742 **Fig. 7** Relative fold change of upregulated and downregulated genes through quantitative real time PCR in the

743 tissues of castor (C0- 0 day, C1-7 days, C2-14 days, C3-21 days), jatropha (J0- 0 day, J1-7 days, J2-14 days, J3-21

744 days) and sunflower (S0- 0 day, S1-7 days, S2-14 days, S3-21 days) after inoculation. **a, b** represent upregulated

745 genes of castor, **c, d** represent downregulated genes of castor, **e, f** represent upregulated genes of Jatropha, **g, h**

746 represent downregulated genes of Jatropha, **i, j** represent upregulated genes of sunflower, **k, l** represent

747 downregulated genes of sunflower, **m-t** represent other genes reported to govern organogenesis.

748

749 **Tables Information**

750 **Table 1** Summary of raw and trimmed reads with assembled reads statistics.

751 **Table 2** Statistics of read alignment and differentially expressed gene summary.

752

753 **Additional files**

754 **Additional file 1: Table S1.** List of all transcripts identified in control and cultured samples of castor with their  
755 basic information collected from NCBI, Uniport database along with structural and functional information.

756 **Additional file 2: Table S2.** List of all transcripts identified after cd-hit-est with 0.9 identity filtering, in control  
757 and cultured samples of Jatropha with their basic information collected from NCBI, Uniport database along with  
758 structural and functional information.

759 **Additional file 3: Table S3.** List of all transcripts identified after cd-hit-est with 0.9 identity filtering, in control  
760 and cultured samples of sunflower with their basic information collected from NCBI, Uniport database along with  
761 structural and functional information.

762 **Additional file 4: Table S4.** Significant upregulated genes ( $P \leq 0.05$ ) identified after DEGs analysis between castor  
763 control and cultured genes with their basic information collected from NCBI, Uniport database along with gene  
764 ontology and functional role in different metabolic pathways.

765 **Additional file 4: Table S5.** Significant downregulated genes ( $P \leq 0.05$ ) identified after DEGs analysis between  
766 castor control and cultured genes with their basic information collected from NCBI, Uniport database along with  
767 gene ontology and functional role in different metabolic pathways.

768 **Additional file 4: Table S6.** Significant upregulated genes ( $P \leq 0.05$ ) identified after DEGs analysis between  
769 Jatropha control and cultured genes with their basic information collected from NCBI, Uniport database along with  
770 gene ontology and functional role in different metabolic pathways.

771 **Additional file 4: Table S7.** Significant downregulated genes ( $P \leq 0.05$ ) identified after DEGs analysis between  
772 Jatropha control and cultured genes with their basic information collected from NCBI, Uniport database along with  
773 Gene ontology, functional role in different metabolic pathways.

774 **Additional file 4: Table S8.** Significant upregulated genes ( $P \leq 0.05$ ) identified after DEGs analysis between  
775 sunflower control and cultured genes with their basic information collected from NCBI, Uniport database along with  
776 gene ontology and functional role in different metabolic pathways.

777 **Additional file 4: Table S9.** Significant downregulated genes ( $P \leq 0.05$ ) identified after DEGs analysis between  
778 sunflower control and cultured genes with their basic information collected from NCBI, Uniport database along with  
779 gene ontology and functional role in different metabolic pathways.

780 **Additional file 4: Table S10.** List of commonly upregulated groups in castor identified after performing  
781 orthologues identification in upregulated DEGs.

782 **Additional file 4: Table S11.** List of commonly upregulated groups in jatropha identified after performing  
783 orthologues identification in upregulated DEGs.

784 **Additional file 4: Table S12.** List of commonly upregulated groups in sunflower identified after performing  
785 orthologues identification in upregulated DEGs.

786 **Additional file 4: Table S13.** List of commonly downregulated groups in castor identified after performing  
787 orthologues identification in downregulated DEGs.

788 **Additional file 4: Table S14.** List of commonly downregulated groups in jatropha identified after performing  
789 orthologues identification in downregulated DEGs.

790 **Additional file 4: Table S15.** List of commonly downregulated groups in sunflower identified after performing  
791 orthologues identification in downregulated DEGs.

792 **Additional file 5: Table S16.** List of genes validated through qRT-PCR along with the primer sequences and the  
793 relative fold change values at four different time points in castor, Jatropha and sunflower.



Table 1

Summary of raw and trimmed reads with assembled reads statistics

| Sample Name | Summary of Raw Reads |                 |              | Summary of Trimmed Reads |                 |              | Assembly Statistics          |                                |                                                                |
|-------------|----------------------|-----------------|--------------|--------------------------|-----------------|--------------|------------------------------|--------------------------------|----------------------------------------------------------------|
|             | No. of Reads         | GC (%) of Reads | Q30 of Reads | No. of Reads             | GC (%) of Reads | Q30 of Reads | No. of assembled transcripts | Longest transcript length (bp) | No of assembled transcripts after cd-hit-est with 0.9 identity |
| <b>C-SD</b> | 58304422             | 46.25           | 93.06        | 32379620                 | 45.75           | 96.19        | 109343                       | 15565                          | 98414                                                          |
| <b>CC</b>   | 44045004             | 44.145          | 93.24        | 26099152                 | 44.30           | 96.47        |                              |                                |                                                                |
| <b>J-SD</b> | 52017052             | 48.775          | 91.66        | 23355268                 | 47.26           | 96.04        | 94073                        | 17264                          | 84375                                                          |
| <b>JC</b>   | 43614842             | 46.635          | 92.735       | 30395124                 | 47.14           | 96.04        |                              |                                |                                                                |
| <b>S-SD</b> | 46548738             | 46.02           | 92.625       | 34094516                 | 47.13           | 95.72        | 130548                       | 15684                          | 120779                                                         |
| <b>SC</b>   | 38366150             | 51.735          | 91.845       | 35661324                 | 52.00           | 95.26        |                              |                                |                                                                |

**C-SD** castor cultured tissues, **CC** castor control, **J-SD** jatropha cultured tissues, **JC** jatropha control, **S-SD** sunflower cultured tissues, **SC** sunflower control

Table 2  
 Statistics of read alignment and differentially expressed gene summary

| Sample identity | No. of filtered reads (paired-end) | No. of reads aligned | Alignment percentage | No. of transcripts $\geq 1$ .0 FPKM | Upregulated DGGs | Downregulated DGGs | No. of transcripts with significant BLASTX |
|-----------------|------------------------------------|----------------------|----------------------|-------------------------------------|------------------|--------------------|--------------------------------------------|
| <b>CC</b>       | 13049576                           | 12297920             | 94.24                | 72416                               | 4758             | 2631               | 55576                                      |
| <b>C-SD</b>     | 16189810                           | 15194137             | 93.85                | 57742                               |                  |                    |                                            |
| <b>JC</b>       | 15197562                           | 14196043             | 93.41                | 50582                               | 2326             | 1229               | 40402                                      |
| <b>J-SD</b>     | 11677634                           | 10383752             | 88.92                | 53627                               |                  |                    |                                            |
| <b>SC</b>       | 17830662                           | 13135849             | 73.67                | 27416                               | 749              | 842                | 52639                                      |
| <b>S-SD</b>     | 17047258                           | 13883287             | 81.44                | 75509                               |                  |                    |                                            |

\***C-SD** castor cultured tissues, **CC** castor control, **J-SD** jatropha cultured tissues, **JC** jatropha control, **S-SD** sunflower cultured tissues, **SC** sunflower control

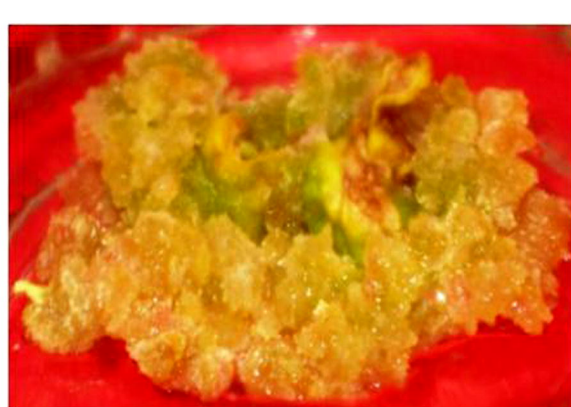

(a)

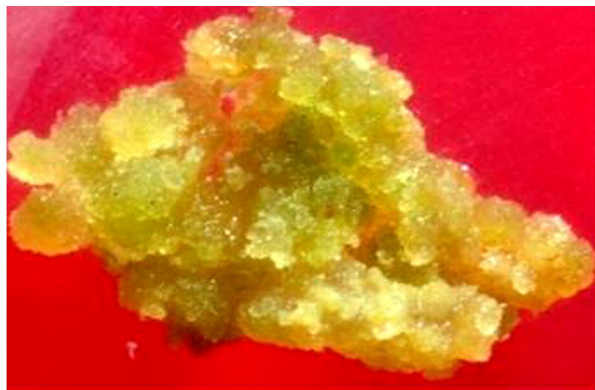

(b)

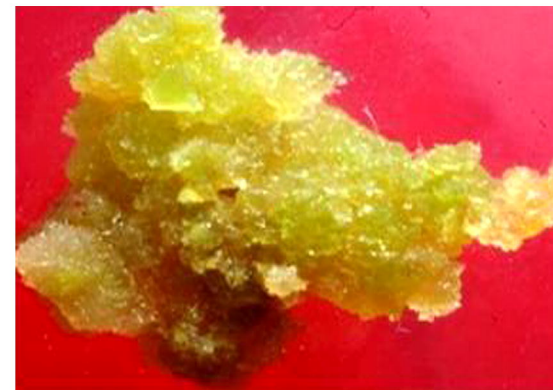

(c)

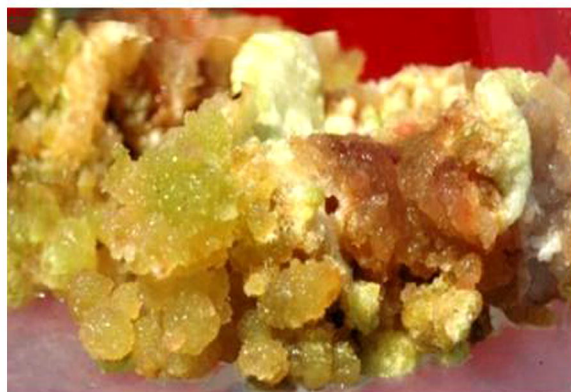

(d)

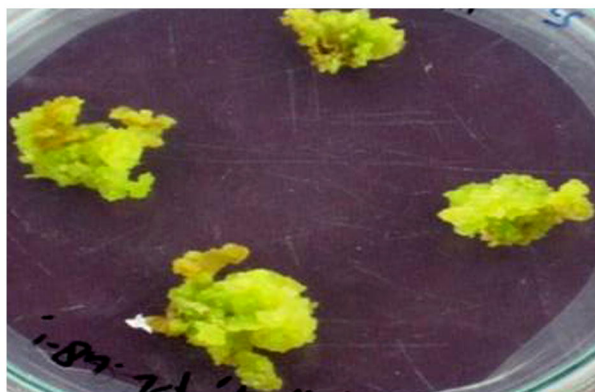

(e)

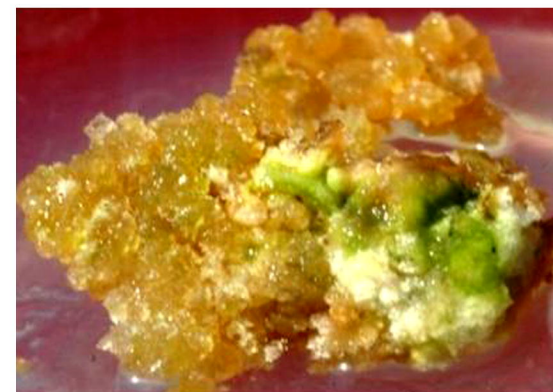

(f)

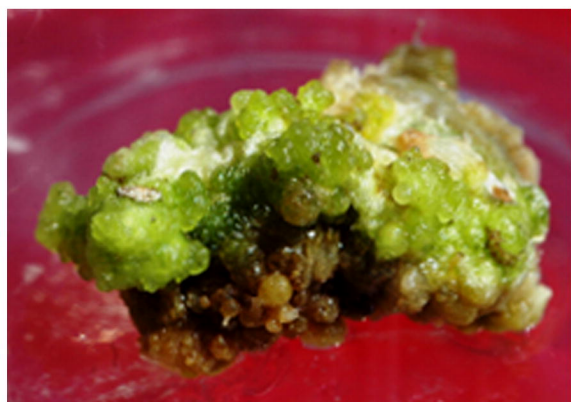

(g)

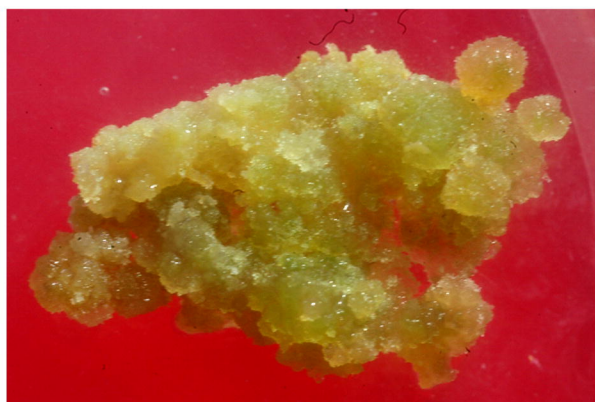

(h)

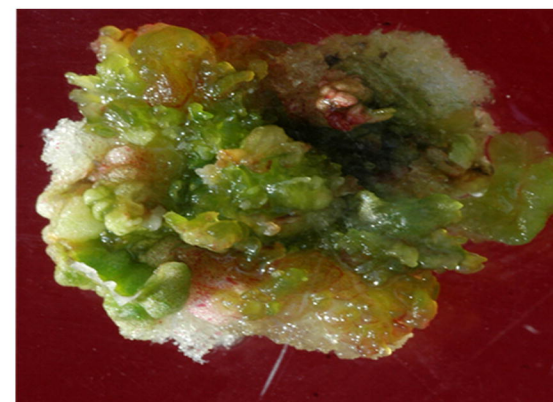

(i)

**Castor**

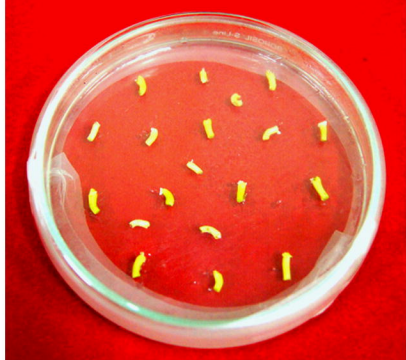

(a)

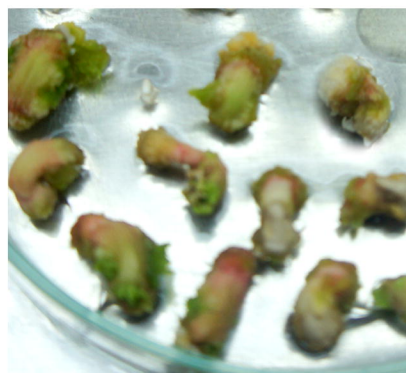

(b)

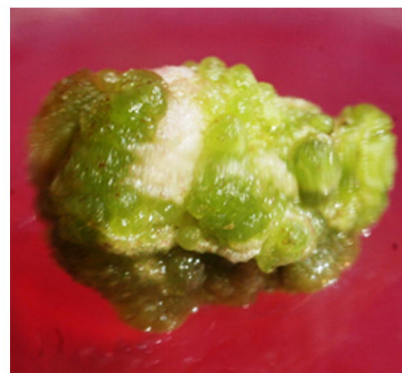

(c)

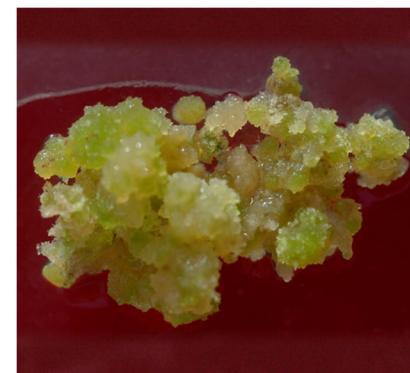

(d)

**Jatropha**

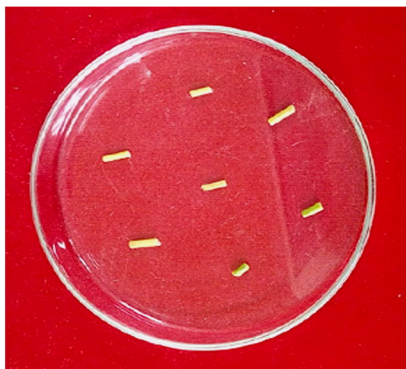

(a)

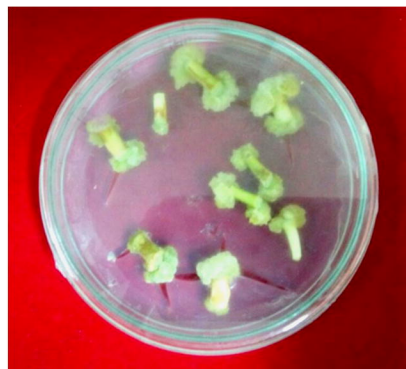

(b)

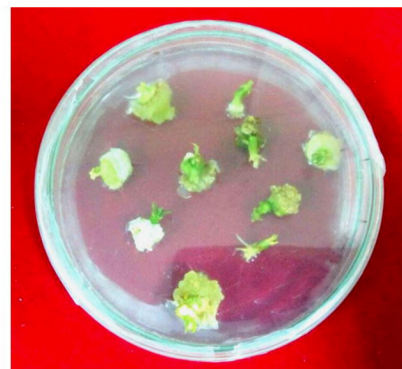

(c)

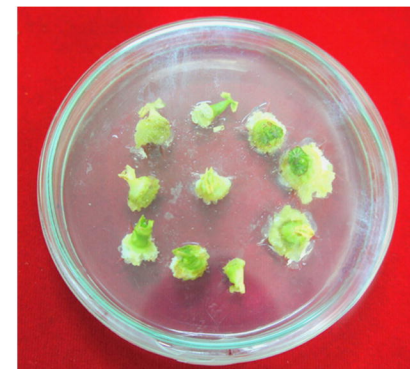

(d)

**Sunflower**

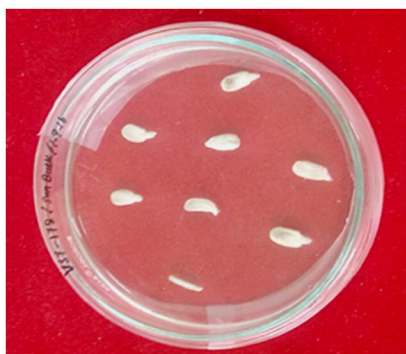

(a)

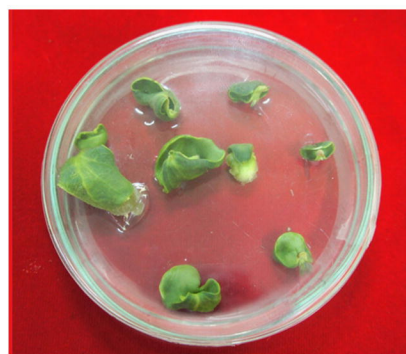

(b)

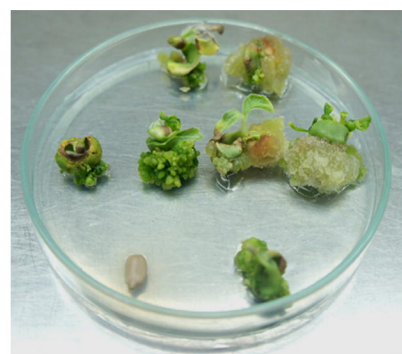

(c)

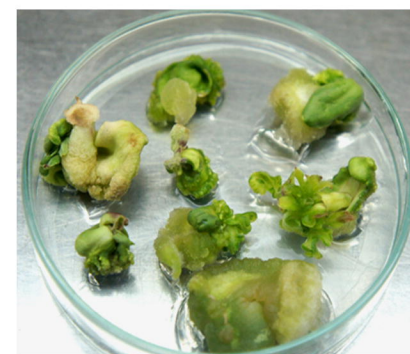

(d)

**#DEGs and Log2(Fold Change) in CC\_vs\_C\_SD**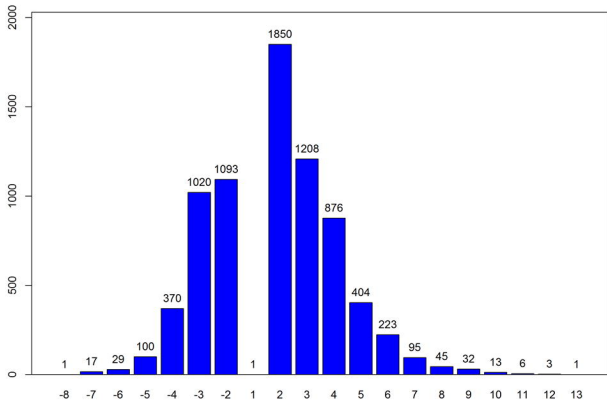**(b)****#DEGs and Log2(Fold Change) in JC\_vs\_J\_SD**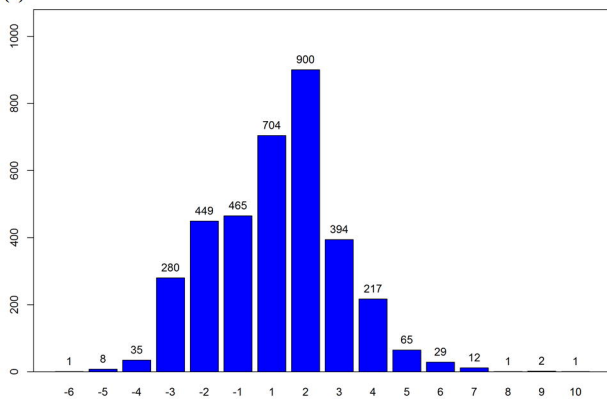**(c)****#DEGs and Log2(Fold Change) in SC\_vs\_S\_SD**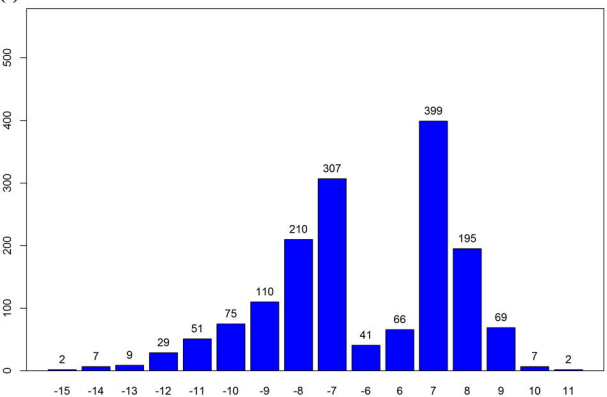

**(a) CPM Distribution Plot of CC\_vs\_C\_SD**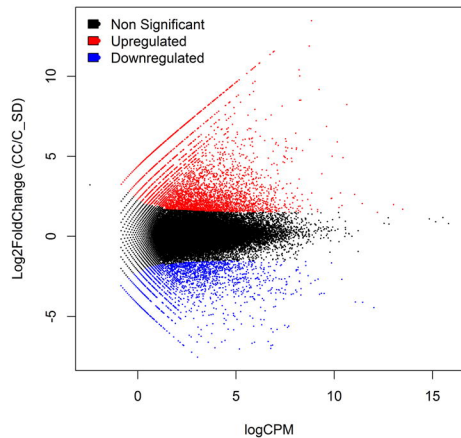**(b) CPM Distribution Plot of JC\_vs\_J\_SD**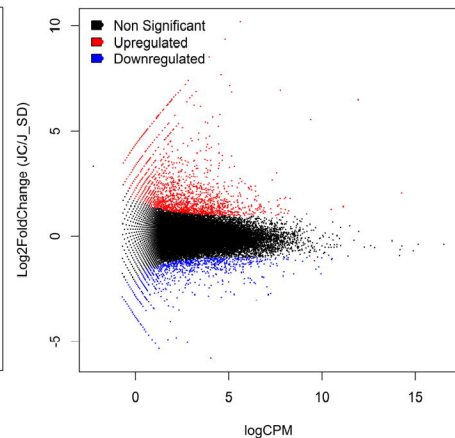**(c) CPM Distribution Plot of CC\_vs\_C\_SD**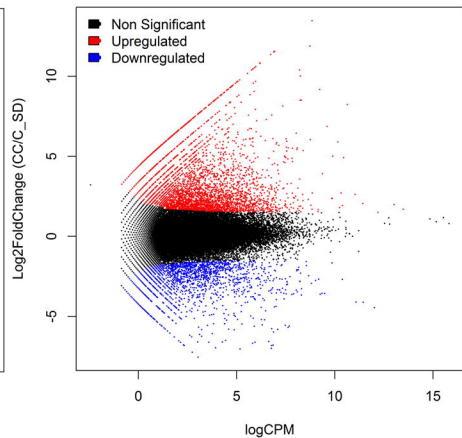

(a)

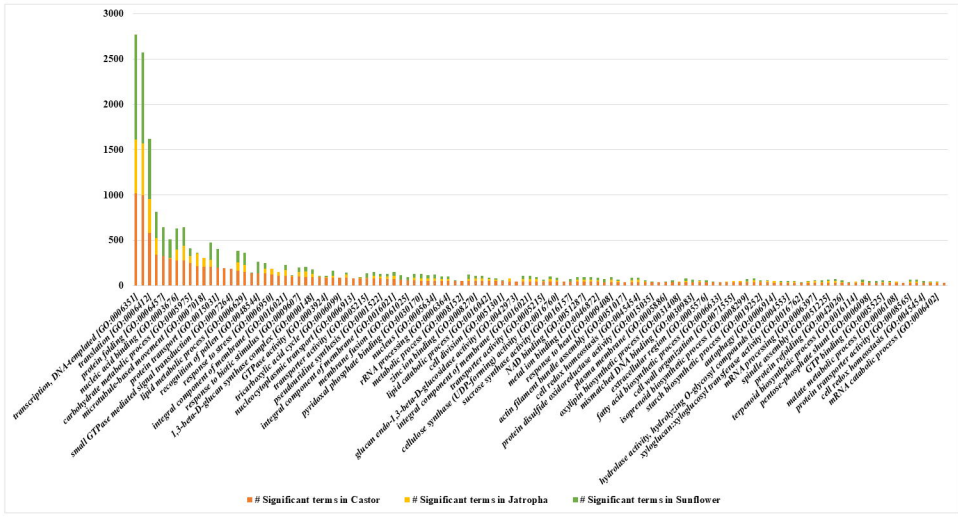

(b)

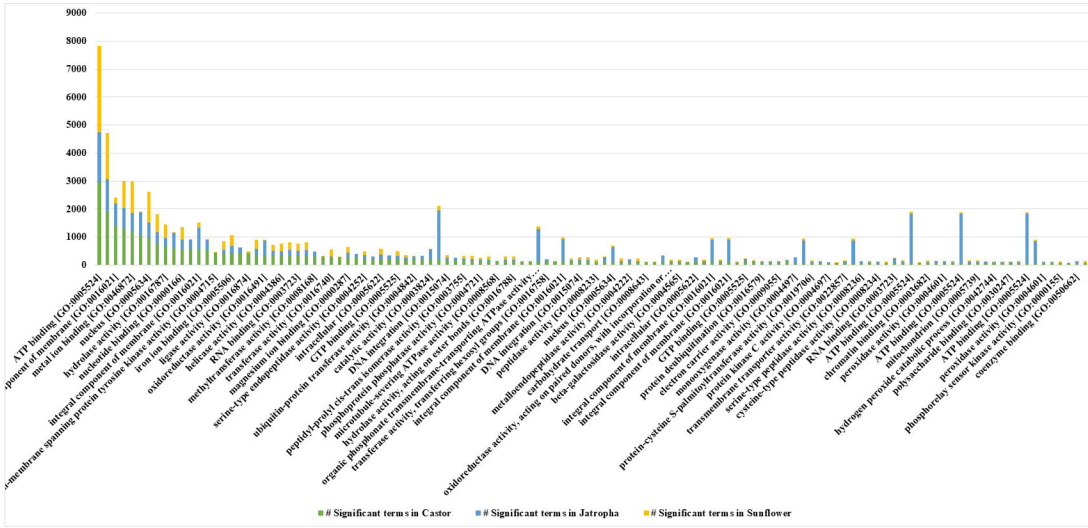

(c)

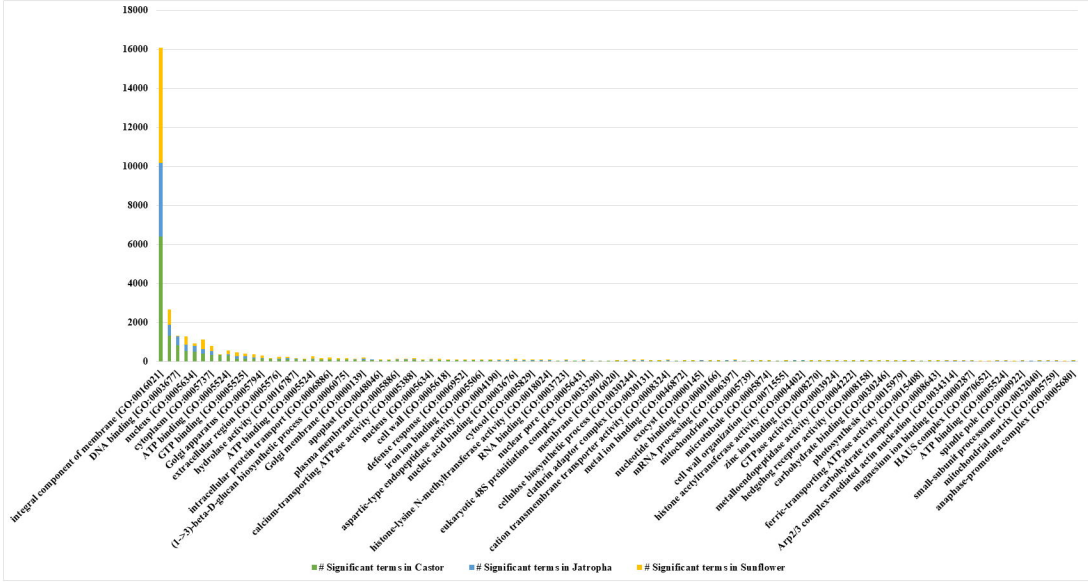

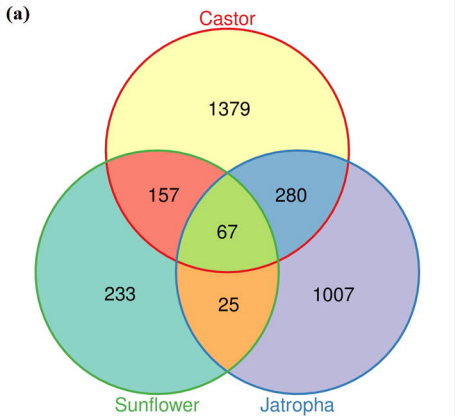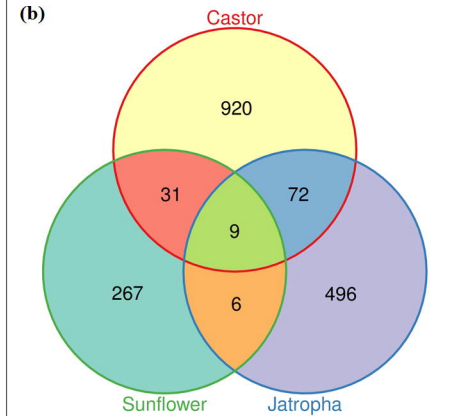



## Figure 7

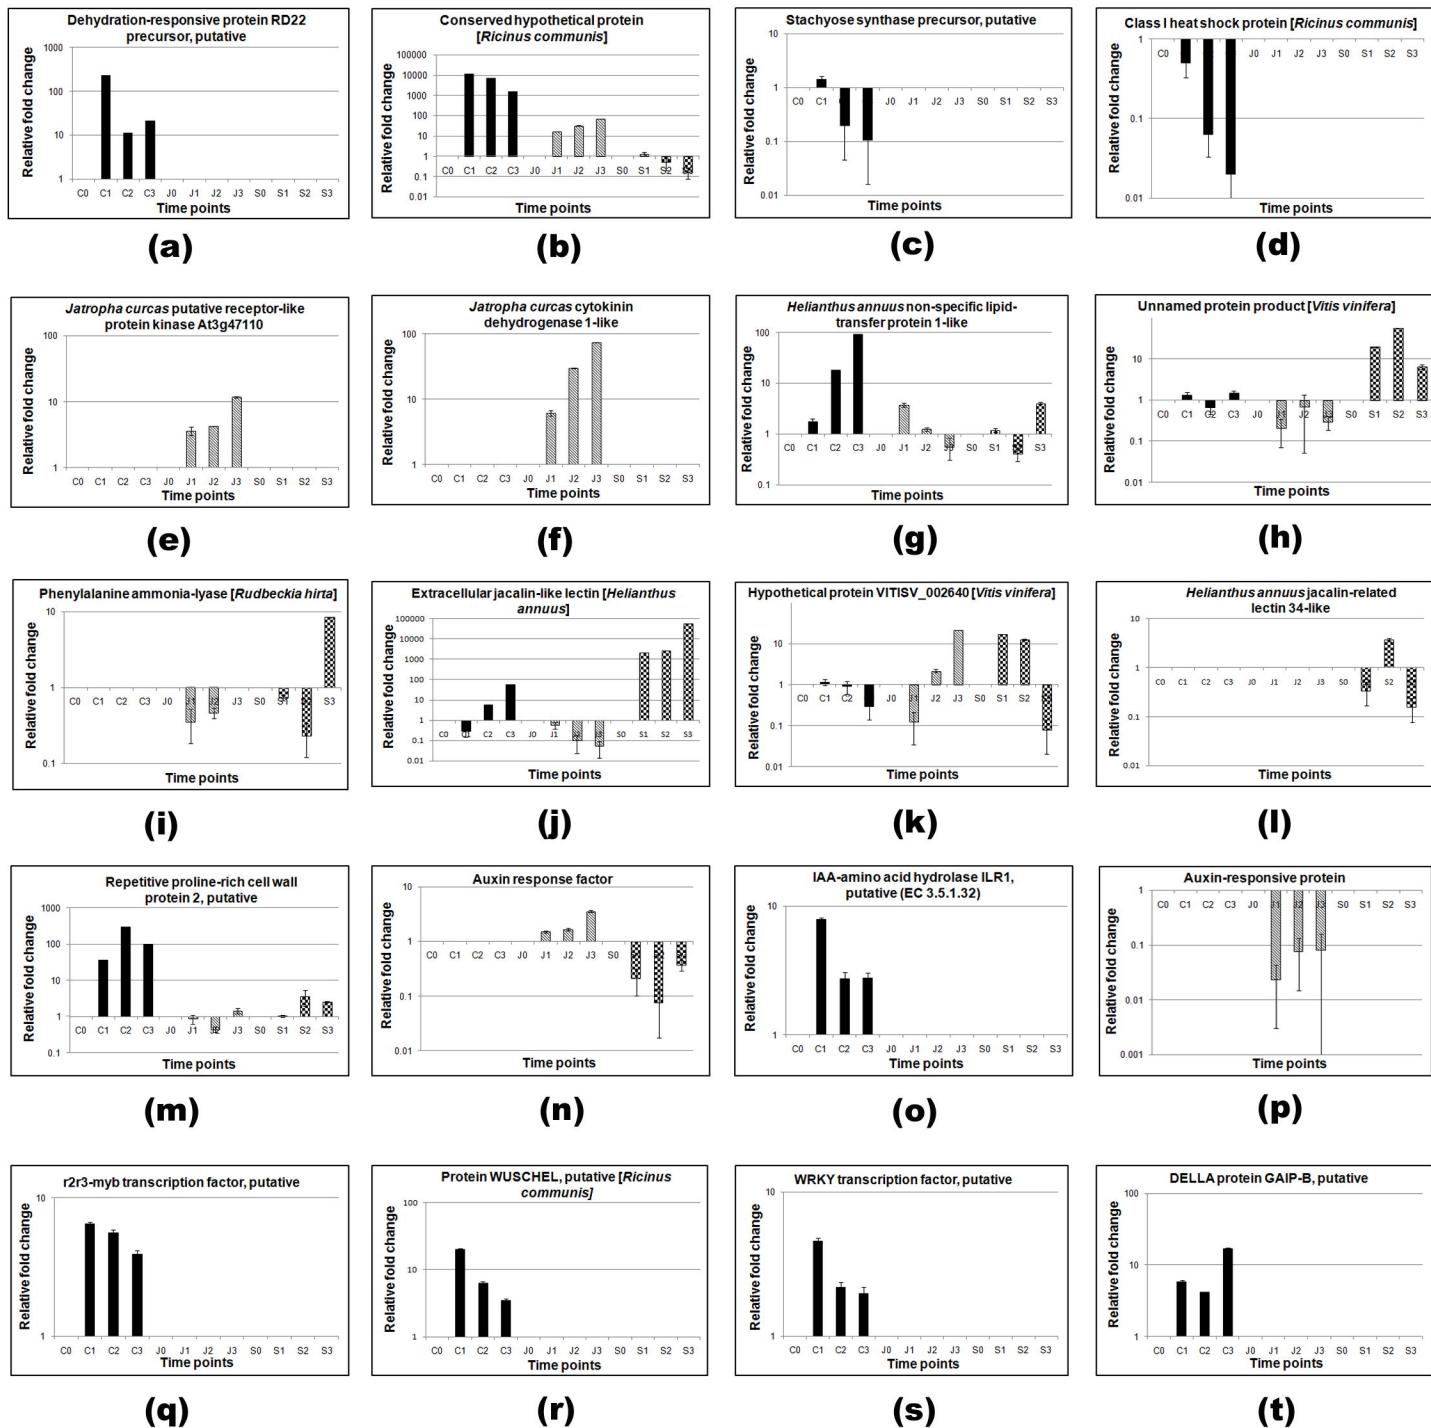

■ Castor    ▨ Jatropha    ▩ Sunflower
